# Supplementary material for: Targeting Sex Determination to Suppress Mosquito Populations
Source: PubMed Central journal article supplement (PMC10168471; doi:10.21203/rs.3.rs-2834069/v1), 2023-04-24
Supplement: NIHPPRS2834069V1-supplement-1.pdf [file NIHPPRS2834069V1-supplement-1.pdf]

## Supplementary Files

This is a list of supplementary files associated with this preprint. Click to download.

- [SUPPLEMENTALDATA.docx](#)
- [Sourcedata.xlsx](#)
- [SupplementaryFigures.docx](#)
