# Supplementary material for: Targeting Sex Determination to Suppress Mosquito Populations
Source: Research Square preprint supplement (doi:10.21203/rs.3.rs-2834069/v1), 2023-04-24
Supplement: Supplementary file 1 [file 2315b6f64317f7733b8f670d.xlsx]

## Sheet: Supp Table 1
Supplementary Table 1. gRNA and primer sequences.
gRNA ID	Description	gRNA Genomic Target Sequence (5' – 3', PAM [NGG])	DNA strand	Cleavage activity
gRNA[dsx]#1	dsx gRNA targets sequence 1	AGCGACATGCAGCCATTCTGGG	Sense	Cleavage
gRNA[dsx]#2	dsx gRNA targets sequence 2	CTCACAAGTAGAGCTACACGTGG	Antisense	Cleavage
gRNA[dsx]#3	dsx gRNA targets sequence 3	GGTAGCTGGCCGTTGCCAAACGG	Sense	No cleavage
gRNA[dsx]#4	dsx gRNA targets sequence 4	CTGTCGTCGTTTTTTTCCGGTGG	Antisense	Cleavage
gRNA[ix]#1	ix gRNA targets sequence 1	GCGGGATTCGCTCTCGACGACGG	Sense	No cleavage
gRNA[ix]#2	ix gRNA targets sequence 2	GGACAACATTTCCAAGGTTAAGG	Sense	Cleavage
Primer ID	Description	5' - Sequence - 3'
dsx F	dsx Foward Primer	GGGCTTTCGTCCTAGAAGAATAA
dsx R	dsx Reverse Primer	TTGCGGTGAGAGACATTAACA
ix F	ix Foward Primer	GCACTTTGCAGACGTTCTTTC
ix R	ix Reverse Primer	CCATCCGGATTCCGAAGATTAC

## Sheet: Supp Table 2
Supplementary Table 2. Measurements of mosquito morphological structures.
female #	Tip of thorax to abdomen (mm)	Wing (mm)	Proboscis (mm)	Antennae (mm)	Palp left (mm)	Palp right (mm)	Ovary left (mm)	Ovary right (mm)
WT ♀	4.5	3.4	2.1	1.8	0.5	0.5	1.2	1.1
WT ♀	4.6	3.7	2.2	1.9	0.6	0.6	1.2	1.4
WT ♀	4.5	3.4	2.1	1.7	0.6	0.6	1.2	1.2
WT ♀	4.4	3.3	2.1	1.9	0.6	0.6	1.2	1.2
WT ♀	4.5	3.5	2.1	1.9	0.6	0.6	1.2	1.2
WT ♀	4.8	3.7	2.2	2	0.6	0.6	1.4	1.5
WT ♀	4.5	3.2	2.1	1.8	0.6	0.5	1.2	1.2
WT ♀	4.7	3.6	2.1	1.9	0.6	0.6	1.3	1.2
WT ♀	4.6	3.3	2.1	1.8	0.6	0.6	1.2	1.3
WT ♀	4.6	3.4	2.1	1.8	0.5	0.5	1.2	1.2
WT ♀	4.7	3.6	2.2	1.9	0.6	0.6	1.3	1.2
WT ♀	4.6	3.5	2.1	1.8	0.6	0.6	1.2	1.3
WT ♀	4.7	3.5	2.1	1.8	0.6	0.6	1.2	1.4
WT ♀	4.6	3.5	2	1.8	0.6	0.6	1.1	1.2
WT ♀	4.7	3.8	2.2	1.8	0.6	0.6	1.3	1.2
Cas9 ♀	4.7	3.6	2	1.9	0.6	0.6	1.4	1.3
Cas9 ♀	4.8	3.7	2.1	2.1	0.6	0.6	1.4	1.4
Cas9 ♀	4.4	3.5	1.9	1.8	0.5	0.5	1.2	1.3
Cas9 ♀	4.6	3.6	2.1	1.9	0.6	0.6	1.3	1.2
Cas9 ♀	4.9	3.8	2.2	2.2	0.6	0.6	1.6	1.5
Cas9 ♀	4.7	3.7	2.1	2.1	0.6	0.6	1.4	1.4
Cas9 ♀	4.2	3.3	1.8	1.9	0.5	0.5	1.1	1.2
Cas9 ♀	4.4	3.4	2	1.9	0.5	0.5	1.3	1.2
Cas9 ♀	4.7	3.5	2.1	1.9	0.6	0.6	1.4	1.3
Cas9 ♀	4.5	3.4	1.9	1.9	0.5	0.5	1.2	1.2
Cas9 ♀	4.6	3.5	2.1	2	0.6	0.6	1.1	1.2
Cas9 ♀	4.7	3.6	2.1	1.9	0.6	0.6	1.3	1.3
Cas9 ♀	4.3	3.2	1.8	1.8	0.5	0.5	1.2	1.2
Cas9 ♀	4.7	3.7	2.1	2	0.6	0.6	1.2	1.4
Cas9 ♀	4.6	3.5	2.1	1.9	0.6	0.6	1.3	1.3
gRNA[dsx] ♀	4.4	3.4	2.1	1.8	0.5	0.5	1.2	1.2
gRNA[dsx] ♀	4.6	3.5	2.2	1.8	0.6	0.6	1.4	1.3
gRNA[dsx] ♀	4.4	3.3	2.2	1.7	0.6	0.6	1.2	1.2
gRNA[dsx] ♀	4.5	3.4	2.1	1.8	0.6	0.6	1.2	1.2
gRNA[dsx] ♀	4.7	3.6	2.2	1.8	0.6	0.6	1.2	1.2
gRNA[dsx] ♀	4.6	3.5	2.1	1.9	0.6	0.6	1.2	1.2
gRNA[dsx] ♀	4.6	3.5	2.1	1.8	0.5	0.5	1.5	1.5
gRNA[dsx] ♀	4.6	3.5	2.1	2	0.5	0.5	1.2	1.3
gRNA[dsx] ♀	4.4	3.2	2.1	1.8	0.5	0.5	1.2	1.2
gRNA[dsx] ♀	4.4	3.4	2.1	1.8	0.5	0.5	1.2	1.2
gRNA[dsx] ♀	4.6	3.4	2.2	1.8	0.5	0.5	1.2	1.4
gRNA[dsx] ♀	4.8	3.7	2.2	1.8	0.5	0.5	1.6	1.4
gRNA[dsx] ♀	4.3	3.2	2.2	1.5	0.6	0.6	1.2	1.2
gRNA[dsx] ♀	4.6	3.5	2.3	1.8	0.6	0.6	1.2	1.2
gRNA[dsx] ♀	4.7	3.7	2.3	1.8	0.6	0.6	1.3	1.2
gRNA[ix] ♀	4.4	3.4	2.1	1.8	0.5	0.5	1.2	1.2
gRNA[ix] ♀	4.6	3.5	2.2	1.8	0.6	0.6	1.4	1.3
gRNA[ix] ♀	4.4	3.3	2.2	1.7	0.6	0.6	1.2	1.2
gRNA[ix] ♀	4.5	3.4	2.1	1.8	0.6	0.6	1.2	1.2
gRNA[ix] ♀	4.7	3.6	2.2	1.8	0.6	0.6	1.2	1.2
gRNA[ix] ♀	4.6	3.5	2.1	1.9	0.6	0.6	1.2	1.2
gRNA[ix] ♀	4.6	3.5	2.1	1.8	0.5	0.5	1.5	1.5
gRNA[ix] ♀	4.6	3.5	2.1	2	0.5	0.5	1.2	1.3
gRNA[ix] ♀	4.4	3.2	2.1	1.8	0.5	0.5	1.2	1.2
gRNA[ix] ♀	4.4	3.4	2.1	1.8	0.5	0.5	1.2	1.2
gRNA[ix] ♀	4.6	3.4	2.2	1.8	0.5	0.5	1.2	1.4
gRNA[ix] ♀	4.8	3.7	2.2	1.8	0.5	0.5	1.6	1.4
gRNA[ix] ♀	4.3	3.2	2.2	1.5	0.6	0.6	1.2	1.2
gRNA[ix] ♀	4.6	3.5	2.3	1.8	0.6	0.6	1.2	1.2
gRNA[ix] ♀	4.7	3.7	2.3	1.8	0.6	0.6	1.3	1.2
gRNA[dsx-ix-βTub] ♀	4.7	3.5	2.1	1.8	0.6	0.6	1.2	1.2
gRNA[dsx-ix-βTub] ♀	4.7	3.5	2.1	1.9	0.6	0.6	1.3	1.4
gRNA[dsx-ix-βTub] ♀	4.7	3.5	2.1	1.8	0.6	0.6	1.2	1.2
gRNA[dsx-ix-βTub] ♀	4.8	3.4	2.1	1.9	0.6	0.6	1.5	1.5
gRNA[dsx-ix-βTub] ♀	4.5	3.4	1.9	1.7	0.5	0.5	1.2	1.2
gRNA[dsx-ix-βTub] ♀	4.7	3.5	2.1	1.8	0.5	0.5	1.2	1.2
gRNA[dsx-ix-βTub] ♀	4.6	3.5	2.1	1.8	0.5	0.5	1.2	1.3
gRNA[dsx-ix-βTub] ♀	4.8	3.7	2.2	1.9	0.5	0.5	1.4	1.4
gRNA[dsx-ix-βTub] ♀	4.6	3.4	2.1	1.8	0.5	0.5	1.2	1.2
gRNA[dsx-ix-βTub] ♀	4.7	3.4	2.1	1.8	0.5	0.5	1.5	1.3
gRNA[dsx-ix-βTub] ♀	4.5	3.4	2	1.8	0.5	0.5	1.2	1.2
gRNA[dsx-ix-βTub] ♀	4.5	3.4	2.1	1.8	0.5	0.5	1.2	1.2
gRNA[dsx-ix-βTub] ♀	4.9	3.4	2.3	2	0.5	0.5	1.5	1.6
gRNA[dsx-ix-βTub] ♀	4.6	3.4	2.1	1.8	0.5	0.5	1.4	1.2
gRNA[dsx-ix-βTub] ♀	4.6	3.4	2.1	1.8	0.6	0.6	1.2	1.3
dsx KO ♀	4.3	3.1	2.1	1.7	1.6	1.1	0.9	0.8
dsx KO ♀	4.3	3	2.1	1.6	1.3	1.3	1.2	0.9
dsx KO ♀	4.2	2.7	1.9	1.7	1.9	1.2	0.9	0.8
dsx KO ♀	4.3	2.9	2	1.7	1.6	1.2	0.9	1.1
dsx KO ♀	4.3	2.9	2.1	1.8	1.4	1.5	0.9	0.6
dsx KO ♀	4.1	3.5	1.9	1.7	1.2	1.4	0.8	1.1
dsx KO ♀	4	2.8	1.8	1.7	1.4	1.7	0.9	0.9
dsx KO ♀	4.1	3.1	2.1	1.6	1.8	1.3	0.9	0.8
dsx KO ♀	3.9	2.8	1.7	1.7	1.4	1	0.9	1.2
dsx KO ♀	4.3	3.2	2.1	1.7	1.3	1.4	0.9	0.9
dsx KO ♀	4.3	3	2.2	1.7	1.7	1.3	0.9	0.9
dsx KO ♀	4.2	3.2	2.1	1.8	1.9	1.3	1.1	0.9
dsx KO ♀	4.3	2.9	2.1	1.7	1.4	1.1	0.9	1.1
dsx KO ♀	3.9	2.8	2.1	1.6	1.3	1.7	0.9	0.9
dsx KO ♀	3.9	2.5	1.8	1.5	1.1	1.6	0.8	0.7
ix KO ♀	4.4	3.2	2.1	1.8	0.9	0.6	0.9	1.1
ix KO ♀	4.2	3.1	1.9	1.7	1.1	0.8	1.2	0.9
ix KO ♀	4.4	3.3	2.1	1.9	0.9	0.8	1.2	1.2
ix KO ♀	4.4	3.2	2.1	1.8	0.8	0.7	0.8	0.7
ix KO ♀	4.3	3.2	1.8	1.9	0.7	0.8	1.2	1.2
ix KO ♀	4.4	3.2	2.1	1.8	0.8	0.6	0.9	0.9
ix KO ♀	4.4	3.2	2	1.8	0.8	0.8	1.2	1.2
ix KO ♀	4.2	3.1	2.1	1.7	0.7	0.5	1.2	1.3
ix KO ♀	4.1	2.9	2.1	1.7	0.5	0.9	1.1	1.2
ix KO ♀	4.3	3.2	2.1	1.8	0.5	0.6	0.7	1.2
ix KO ♀	4	3.1	1.9	1.6	0.6	0.4	1.2	0.8
ix KO ♀	4.2	3.2	2.1	1.8	0.6	0.9	1.2	1.2
ix KO ♀	4.2	3.3	2	1.8	0.7	0.9	1.3	1.1
ix KO ♀	4.5	3.4	2.1	1.8	0.8	0.7	1.1	1
ix KO ♀	4.4	3.1	2.1	1.9	0.9	0.8	0.7	1.2
dsx-ix-βTub KO ♀	3.9	2.7	1.7	1.6	0.8	1.2	0.5	0.4
dsx-ix-βTub KO ♀	4.1	2.8	2	1.7	1.1	1.1	0.8	0.4
dsx-ix-βTub KO ♀	4	2.8	2.1	1.7	0.8	0.8	0.3	0.5
dsx-ix-βTub KO ♀	4.1	2.9	2	1.8	0.9	1	0.6	0.5
dsx-ix-βTub KO ♀	3.8	2.7	1.8	1.6	1.2	1.1	0.5	0.4
dsx-ix-βTub KO ♀	4.1	2.8	2.1	1.8	1.1	1.2	0.3	0.5
dsx-ix-βTub KO ♀	4.2	3.1	1.9	1.8	1.2	1.2	0.5	0.5
dsx-ix-βTub KO ♀	4.1	2.9	2.2	1.7	1.5	1.4	0.5	0.4
dsx-ix-βTub KO ♀	4.3	3	2.1	1.7	1.2	0.8	0.4	0.5
dsx-ix-βTub KO ♀	4.5	3.2	2.2	1.8	1.4	0.9	0.5	0.7
dsx-ix-βTub KO ♀	3.9	2.7	1.7	1.5	1.1	1.4	0.4	0.4
dsx-ix-βTub KO ♀	4.2	3.1	2.1	1.8	0.9	1.2	0.4	0.3
dsx-ix-βTub KO ♀	4	2.9	1.8	1.7	0.8	1.1	0.5	0.4
dsx-ix-βTub KO ♀	4.2	3.1	2.1	1.9	0.9	1.2	0.3	0.5
dsx-ix-βTub KO ♀	4.2	2.9	2.1	1.8	1.3	1.5	0.5	0.4
male #	Tip of thorax to abdomen (mm)	Wing (mm)	Proboscis (mm)	Antennae (mm)	Palp left (mm)	Palp right (mm)	Testes left (mm)	Testes right (mm)	Accessory gland left (mm)	Accessory gland right (mm)
WT ♂	3.8	2.5	2	1.5	2.1	2.1	0.4	0.4	0.37	0.33
WT ♂	3.7	2.5	2.1	1.5	1.9	1.9	0.5	0.5	0.35	0.34
WT ♂	3.9	2.6	2.2	1.6	2.1	2.1	0.5	0.5	0.39	0.35555
WT ♂	3.6	2.4	1.9	1.4	1.8	1.7	0.5	0.5	0.35	0.38095
WT ♂	3.8	2.6	2	1.5	2	2	0.5	0.5	0.35555	0.34603
WT ♂	3.6	2.5	1.8	1.5	1.8	1.8	0.4	0.4	0.34	0.34901
WT ♂	3.7	2.6	1.9	1.5	1.8	1.9	0.5	0.5	0.34	0.36
WT ♂	3.7	2.5	1.8	1.5	1.9	1.9	0.4	0.5	0.35	0.36
WT ♂	3.8	2.6	2.1	1.5	2.1	2	0.4	0.4	0.37777	0.34
WT ♂	3.7	2.5	1.8	1.5	1.9	1.9	0.5	0.5	0.35	0.37
WT ♂	3.8	2.6	1.9	1.5	2	2	0.5	0.5	0.38	0.38
WT ♂	3.8	2.6	2.2	1.6	2.1	2.2	0.4	0.4	0.36	0.37
WT ♂	3.5	2.4	1.7	1.4	1.7	1.7	0.4	0.5	0.35	0.34603
WT ♂	3.7	2.5	1.8	1.5	1.8	1.8	0.5	0.5	0.33	0.34901
WT ♂	3.8	2.6	2	1.5	2.1	2.1	0.5	0.5	0.36	0.36
Cas9 ♂	3.6	2.4	1.8	1.3	1.7	1.7	0.4	0.5	0.37	0.38095
Cas9 ♂	3.5	2.4	1.7	1.4	1.8	1.8	0.5	0.3	0.37	0.37
Cas9 ♂	3.9	2.7	1.8	1.3	1.9	1.9	0.5	0.6	0.39	0.38
Cas9 ♂	3.8	2.6	1.9	1.5	1.9	1.9	0.3	0.5	0.39	0.39
Cas9 ♂	3.9	2.6	2	1.5	2	2	0.6	0.6	0.38	0.37
Cas9 ♂	3.9	2.7	2.1	1.5	2.1	2.1	0.6	0.6	0.39	0.38
Cas9 ♂	3.7	2.6	1.6	1.2	1.7	1.6	0.5	0.5	0.36	0.37
Cas9 ♂	3.6	2.6	1.6	1.2	1.7	1.7	0.5	0.5	0.35	0.37
Cas9 ♂	4	2.8	2.2	1.5	2.1	2.1	0.6	0.5	0.39	0.38
Cas9 ♂	3.6	2.5	1.7	1.3	1.6	1.6	0.4	0.5	0.35	0.35
Cas9 ♂	3.8	2.7	1.8	1.5	1.9	1.9	0.5	0.5	0.38	0.37
Cas9 ♂	3.5	2.4	1.8	1.2	1.6	1.6	0.5	0.4	0.35	0.36
Cas9 ♂	3.8	2.6	1.9	1.5	1.8	1.8	0.5	0.4	0.39	0.37
Cas9 ♂	3.7	2.6	1.7	1.4	1.8	1.8	0.6	0.5	0.36	0.38
Cas9 ♂	3.9	2.8	2.1	1.6	2.1	2.2	0.5	0.5	0.39	0.37
gRNA[dsx] ♂	3.9	2.6	1.9	1.5	2	1.9	0.5	0.5	0.38	0.37
gRNA[dsx] ♂	3.7	2.6	1.7	1.2	2	2	0.6	0.5	0.36	0.4
gRNA[dsx] ♂	3.7	2.5	1.6	1.3	1.9	1.9	0.5	0.5	0.37	0.33
gRNA[dsx] ♂	3.8	2.6	1.9	1.4	1.8	1.8	0.4	0.5	0.35	0.38095
gRNA[dsx] ♂	3.8	2.6	2	1.5	1.9	1.9	0.5	0.5	0.38	0.37
gRNA[dsx] ♂	3.8	2.5	2.1	1.6	1.9	1.9	0.6	0.5	0.33	0.36
gRNA[dsx] ♂	3.8	2.6	1.9	1.5	2	1.9	0.5	0.5	0.35	0.35
gRNA[dsx] ♂	3.8	2.6	1.9	1.5	1.9	1.9	0.5	0.4	0.35	0.38
gRNA[dsx] ♂	3.8	2.5	2	1.5	1.8	1.8	0.5	0.4	0.36	0.34
gRNA[dsx] ♂	3.7	2.5	1.8	1.5	1.8	1.8	0.5	0.5	0.39	0.36
gRNA[dsx] ♂	3.8	2.5	1.9	1.3	1.9	1.9	0.5	0.5	0.37	0.39
gRNA[dsx] ♂	3.8	2.6	2	1.6	2	2.1	0.4	0.5	0.36	0.35
gRNA[dsx] ♂	3.9	2.6	2.1	1.6	1.9	1.9	0.5	0.6	0.36	0.33
gRNA[dsx] ♂	3.8	2.7	2	1.5	2.1	2.1	0.5	0.4	0.35	0.39
gRNA[dsx] ♂	3.8	2.6	2.2	1.5	1.9	1.9	0.5	0.5	0.38	0.41
gRNA[ix] ♂	3.8	2.5	1.9	1.4	1.9	1.8	0.5	0.5	0.38	0.38
gRNA[ix] ♂	3.6	2.5	1.8	1.4	1.8	1.8	0.4	0.5	0.37	0.39
gRNA[ix] ♂	3.8	2.7	1.9	1.5	2	2	0.5	0.5	0.38	0.36
gRNA[ix] ♂	3.8	2.6	1.9	1.5	1.9	1.9	0.5	0.5	0.37	0.37
gRNA[ix] ♂	3.7	2.6	1.7	1.4	1.8	1.8	0.6	0.5	0.35	0.35
gRNA[ix] ♂	3.7	2.6	1.8	1.4	1.7	1.8	0.4	0.5	0.35	0.34
gRNA[ix] ♂	3.9	2.7	2	1.5	1.9	1.9	0.5	0.6	0.34	0.33
gRNA[ix] ♂	3.9	2.6	2.1	1.6	1.8	1.8	0.5	0.5	0.35	0.39
gRNA[ix] ♂	3.7	2.5	1.7	1.4	1.8	1.8	0.5	0.5	0.37	0.35
gRNA[ix] ♂	3.9	2.6	1.8	1.3	2.1	2.1	0.5	0.5	0.38	0.31
gRNA[ix] ♂	3.6	2.6	1.7	1.2	1.7	1.6	0.4	0.5	0.35	0.33
gRNA[ix] ♂	3.7	2.6	1.8	1.3	1.8	1.8	0.5	0.5	0.36	0.38
gRNA[ix] ♂	3.8	2.5	1.9	1.3	1.9	1.9	0.6	0.6	0.34	0.35
gRNA[ix] ♂	3.9	2.6	2.1	1.6	2	2	0.5	0.5	0.35	0.36
gRNA[ix] ♂	3.7	2.6	1.9	1.5	1.8	1.8	0.5	0.5	0.33	0.36
gRNA[dsx-ix-βTub] ♂	3.8	2.6	1.8	1.4	1.8	1.8	0.5	0.5	0.34	0.36
gRNA[dsx-ix-βTub] ♂	3.7	2.5	1.8	1.4	1.8	1.8	0.5	0.5	0.38	0.36
gRNA[dsx-ix-βTub] ♂	3.7	2.5	1.7	1.3	1.7	1.6	0.5	0.5	0.36	0.36
gRNA[dsx-ix-βTub] ♂	3.8	2.7	1.9	1.4	1.8	1.8	0.4	0.5	0.36	0.33
gRNA[dsx-ix-βTub] ♂	3.7	2.7	1.7	1.3	1.6	1.6	0.5	0.5	0.37	0.34
gRNA[dsx-ix-βTub] ♂	3.9	2.7	2.1	1.6	2.1	2.1	0.6	0.6	0.36	0.39
gRNA[dsx-ix-βTub] ♂	3.8	2.8	1.9	1.3	2.1	2.1	0.5	0.5	0.38	0.38
gRNA[dsx-ix-βTub] ♂	3.9	2.8	2.1	1.6	1.9	1.9	0.6	0.6	0.39	0.37
gRNA[dsx-ix-βTub] ♂	3.8	2.9	1.9	1.4	1.9	1.9	0.5	0.5	0.35	0.38
gRNA[dsx-ix-βTub] ♂	3.9	2.8	2	1.5	1.9	1.9	0.5	0.4	0.37	0.4
gRNA[dsx-ix-βTub] ♂	3.7	2.6	1.7	1.3	1.6	1.6	0.5	0.5	0.37	0.35
gRNA[dsx-ix-βTub] ♂	3.5	2.5	1.6	1.2	1.5	1.5	0.5	0.5	0.38	0.38
gRNA[dsx-ix-βTub] ♂	3.5	2.5	1.5	1.1	1.6	1.6	0.5	0.5	0.37	0.37
gRNA[dsx-ix-βTub] ♂	3.6	2.5	1.7	1.2	1.7	1.7	0.4	0.5	0.37	0.38
gRNA[dsx-ix-βTub] ♂	3.8	2.7	2.1	1.7	2	1.9	0.5	0.5	0.38	0.39
dsx KO ♂	3.7	2.7	1.9	1.5	1.8	1.8	0.5	0.5	0.35	0.37
dsx KO ♂	3.8	2.7	1.9	1.6	1.8	1.8	0.5	0.5	0.35	0.35
dsx KO ♂	3.7	2.7	1.8	1.5	1.8	1.8	0.5	0.5	0.35	0.35
dsx KO ♂	3.8	2.8	1.8	1.5	1.8	1.8	0.5	0.5	0.36	0.35
dsx KO ♂	3.8	2.7	1.8	1.5	1.8	1.7	0.5	0.5	0.35	0.35
dsx KO ♂	3.7	2.7	1.9	1.5	1.9	1.9	0.5	0.5	0.36	0.35
dsx KO ♂	3.8	2.7	1.8	1.6	1.8	1.8	0.5	0.5	0.36	0.36
dsx KO ♂	3.7	2.8	1.9	1.5	1.9	1.9	0.5	0.6	0.37	0.37
dsx KO ♂	3.8	2.8	1.9	1.5	1.9	1.9	0.5	0.5	0.37	0.37
dsx KO ♂	3.7	2.7	1.9	1.5	1.9	1.9	0.5	0.5	0.37	0.36
dsx KO ♂	3.8	2.8	2	1.6	1.7	1.7	0.5	0.5	0.36	0.35
dsx KO ♂	3.7	2.7	1.8	1.5	1.8	1.8	0.5	0.5	0.39	0.39
dsx KO ♂	3.9	2.7	1.8	1.5	1.8	1.8	0.4	0.5	0.39	0.39
dsx KO ♂	3.7	2.6	1.8	1.5	1.8	1.8	0.5	0.5	0.36	0.39
dsx KO ♂	3.8	2.7	1.8	1.6	1.8	1.8	0.5	0.5	0.39	0.36
ix KO ♂	3.8	2.8	1.8	1.6	1.8	1.8	0.5	0.5	0.37	0.37
ix KO ♂	3.7	2.8	1.8	1.5	1.8	1.8	0.5	0.5	0.37	0.37
ix KO ♂	3.7	2.7	1.8	1.6	1.8	1.8	0.5	0.5	0.37	0.37
ix KO ♂	3.7	2.7	1.9	1.5	1.7	1.7	0.6	0.6	0.36	0.37
ix KO ♂	3.9	2.8	1.9	1.5	1.8	1.8	0.5	0.5	0.37	0.37
ix KO ♂	3.8	2.7	1.8	1.5	1.8	1.9	0.5	0.5	0.36	0.36
ix KO ♂	3.8	2.8	1.8	1.5	1.8	1.8	0.6	0.5	0.37	0.36
ix KO ♂	3.8	2.7	1.8	1.5	1.8	1.8	0.5	0.6	0.35	0.35
ix KO ♂	3.7	2.7	2	1.6	1.9	1.9	0.5	0.5	0.35	0.35
ix KO ♂	3.7	2.8	1.8	1.6	1.9	1.9	0.5	0.4	0.36	0.36
ix KO ♂	3.7	2.7	1.8	1.5	1.8	1.8	0.5	0.5	0.36	0.36
ix KO ♂	3.8	2.8	1.9	1.5	1.9	1.8	0.5	0.5	0.36	0.36
ix KO ♂	3.8	2.7	1.9	1.5	1.8	1.8	0.5	0.5	0.36	0.36
ix KO ♂	3.7	2.8	1.8	1.6	1.8	1.8	0.5	0.5	0.37	0.37
ix KO ♂	3.7	2.7	1.9	1.6	1.8	1.8	0.5	0.5	0.37	0.37
dsx-ix-βTub KO ♂	3.8	2.6	2	1.5	1.9	1.9	0.5	0.5	0.35	0.35
dsx-ix-βTub KO ♂	3.9	2.7	2	1.5	2	2	0.5	0.5	0.35	0.33
dsx-ix-βTub KO ♂	3.9	2.7	2.1	1.6	2.1	2	0.5	0.5	0.36	0.36
dsx-ix-βTub KO ♂	3.5	2.6	1.7	1.3	1.7	1.7	0.5	0.4	0.35	0.35
dsx-ix-βTub KO ♂	3.7	2.6	1.8	1.4	1.7	1.7	0.5	0.5	0.34	0.35
dsx-ix-βTub KO ♂	3.8	2.7	1.9	1.4	1.8	1.8	0.5	0.5	0.35	0.32
dsx-ix-βTub KO ♂	3.9	2.8	1.9	1.5	1.8	1.9	0.6	0.6	0.36	0.36
dsx-ix-βTub KO ♂	3.5	2.5	1.6	1.3	1.6	1.6	0.4	0.5	0.35	0.35
dsx-ix-βTub KO ♂	3.7	2.6	1.6	1.2	1.5	1.5	0.5	0.4	0.35	0.38
dsx-ix-βTub KO ♂	3.8	2.8	1.9	1.4	1.9	1.9	0.5	0.5	0.36	0.36
dsx-ix-βTub KO ♂	3.9	2.7	2.1	1.6	2.1	2.1	0.5	0.5	0.35	0.36
dsx-ix-βTub KO ♂	3.7	2.6	1.6	1.3	1.6	1.6	0.4	0.4	0.35	0.35
dsx-ix-βTub KO ♂	3.8	2.7	1.8	1.3	1.9	1.9	0.5	0.5	0.35	0.35
dsx-ix-βTub KO ♂	3.7	2.7	1.8	1.3	1.7	1.7	0.5	0.5	0.35	0.35
dsx-ix-βTub KO ♂	3.5	2.5	1.6	1.3	1.5	1.5	0.4	0.5	0.36	0.37

## Sheet: Supp Table 3
Supplementary Table 3. Data for dsx and ix single-gene disruption.
Parents of the group	Egg #	Number of eggs per ♀ laid	Normalized number of eggs per ♀ laid	Hatched egg #	Hatching rate	Adult#	larval death %	Egg-to-adult survival	F1 progeny	♂ pupa #	♂ pupal eclosion death	♂ pupa-adult survival	♀ pupa #	♀ pupal eclosion death#	♀ pupa-adult survival	Blood taking ♀	♀ blood taking rate	♂ adult %	⚥#	⚥ pupal eclosion death	⚥ pupal mortality	Survival ⚥ #	⚥ survial %	⚥ take blood	⚥ blood taking rate	Eggs by (F1 ⚥ X 100 wt ♂)	Number of eggs per ⚥ laid	Normalized number of eggs per ⚥ laid	Hatched eggs by (F1 ⚥ X 100 wt ♂)	Hatched eggs % by (F1 ⚥ X 100 wt ♂)	Eggs by (5 wt ♀ X 5 F1 ♂)	Normalized number of eggs per one wt ♀ mated with 5 F1 ♂	Hatch eggs by (5 wt ♀ X 5 F1 ♂	Hatched eggs % by (5 wt ♀ X 5 F1 ♂)
5 wt♂ X 5 wt♀	568	113.6	100	545	95.9507	488	6.78899	85.9155	+/+	251	11	0.956175	257	9	96.4981	236	95.1613	49.1803	0
5 wt♂ X 5 wt♀	529	105.8	93.1338	502	94.896	462	4.18327	87.3346	+/+	243	13	0.946502	238	6	97.479	228	98.2759	49.7835	0
5 wt♂ X 5 wt♀	503	100.6	88.5563	481	95.6262	423	8.52391	84.0954	+/+	226	10	0.955752	214	7	96.729	205	99.0338	51.0638	0
5 wt♂ X 5 nup50-Cas9/nup50-Cas9♀	454	90.8	79.9296	427	94.0529	365	11.7096	80.3965	+/nup50-Cas9/nup50-Cas9	195	7	0.964103	182	5	97.2527	172	97.1751	51.5068	0
5 wt♂ X 5 nup50-Cas9/nup50-Cas9♀	497	99.4	87.5	458	92.1529	402	7.64192	80.8853	+/nup50-Cas9/nup50-Cas9	215	12	0.944186	208	9	95.6731	188	94.4724	50.4975	0
5 wt♂ X 5 nup50-Cas9/nup50-Cas9♀	411	82.2	72.3592	362	88.0779	302	10.221	73.4793	+/nup50-Cas9/nup50-Cas9	153	9	0.941176	172	14	91.8605	155	98.1013	47.6821	0
5 nup50-Cas9/nup50-Cas♂ X 5 wt♀	448	89.6	78.8732	403	89.9554	339	11.4144	75.6696	+/nup50-Cas9/nup50-Cas9	182	6	0.967033	175	12	93.1429	159	97.546	51.9174	0
5 nup50-Cas9/nup50-Cas♂ X 5 wt♀	515	103	90.669	486	94.3689	431	6.3786	83.6893	+/nup50-Cas9/nup50-Cas9	237	15	0.936709	218	9	95.8716	201	96.1722	51.5081	0
5 nup50-Cas9/nup50-Cas♂ X 5 wt♀	537	107.4	94.5423	502	93.4823	432	7.56972	80.4469	+/nup50-Cas9/nup50-Cas9	239	12	0.949791	225	20	91.1111	199	97.0732	52.5463	0
5 gRNA[dsx]#1/+♂ X 5 wt♀	553	110.6	97.3592	515	93.1284	463	5.82524	83.7251	gRNA[dsx]#1♂/+	124	5	0.959677	122	8	93.4426	110	96.4912	48.5961	0
5 gRNA[dsx]#1/+♂ X 5 wt♀	475	95	83.6268	445	93.6842	399	6.51685	84	gRNA[dsx]#1♂/+	89	3	0.966292	113	5	95.5752	107	99.0741	47.8697	0
5 gRNA[dsx]#1/+♂ X 5 wt♀	511	102.2	89.9648	487	95.3033	422	10.4723	82.5832	gRNA[dsx]#1♂/+	114	4	0.964912	117	3	97.4359	111	97.3684	50.9479	0
									gRNA[dsx]#1♂. +/+	112	6	0.946429	127	3	97.6378	122	98.3871		0
									gRNA[dsx]#1♂. +/+	110	5	0.954545	104	4	96.1538	97	97		0
									gRNA[dsx]#1♂. +/+	109	4	0.963303	96	3	96.875	92	98.9247		0
5 wt♂ X 5 gRNA[dsx]#1/+♀	408	81.6	71.831	373	91.4216	317	11.2601	77.6961	gRNA[dsx]#1♀/+	92	4	0.956522	86	5	94.186	78	96.2963	51.4196	0
5 wt♂ X 5 gRNA[dsx]#1/+♀	546	109.2	96.1268	513	93.956	461	6.23782	84.4322	gRNA[dsx]#1♀/+	122	5	0.959016	115	4	96.5217	108	97.2973	49.8915	0
5 wt♂ X 5 gRNA[dsx]#1/+♀	505	101	88.9085	468	92.6733	415	7.69231	82.1782	gRNA[dsx]#1♀/+	113	6	0.946903	98	3	96.9388	93	97.8947	50.3614	0
									gRNA[dsx]#1♀. +/+	78	3	0.961538	75	2	97.3333	70	95.8904		0
									gRNA[dsx]#1♀. +/+	119	6	0.94958	125	5	96	116	96.6667		0
									gRNA[dsx]#1♀. +/+	106	4	0.962264	115	4	96.5217	108	97.2973		0
5 gRNA[dsx]#2/+♂ X 5 wt♀	505	101	88.9085	487	96.4356	418	10.6776	82.7723	gRNA[dsx]#2♂/+	107	2	0.981308	93	4	95.6989	87	97.7528	54.5455	0
5 gRNA[dsx]#2/+♂ X 5 wt♀	612	122.4	107.746	573	93.6275	495	9.24956	80.8824	gRNA[dsx]#2♂/+	137	6	0.956204	123	5	95.935	116	98.3051	51.9192	0
5 gRNA[dsx]#2/+♂ X 5 wt♀	553	110.6	97.3592	516	93.3092	454	8.13953	82.0976	gRNA[dsx]#2♂/+	125	4	0.968	104	5	95.1923	98	98.9899	53.5242	0
									gRNA[dsx]#2♂. +/+	130	7	0.946154	105	4	96.1905	96	95.0495		0
									gRNA[dsx]#2♂. +/+	133	7	0.947368	127	7	94.4882	116	96.6667		0
									gRNA[dsx]#2♂. +/+	127	5	0.96063	118	6	94.9153	112	100		0
5 wt♂ X 5 gRNA[dsx]#2/+♀	496	99.2	87.3239	459	92.5403	399	8.93246	80.4435	gRNA[dsx]#2♀/+	95	3	0.968421	101	6	94.0594	91	95.7895	50.1253	0
5 wt♂ X 5 gRNA[dsx]#2/+♀	484	96.8	85.2113	449	92.7686	403	6.01336	83.2645	gRNA[dsx]#2♀/+	98	2	0.979592	95	5	94.7368	90	100	50.1241	0
5 wt♂ X 5 gRNA[dsx]#2/+♀	392	78.4	69.0141	355	90.5612	312	7.60563	79.5918	gRNA[dsx]#2♀/+	75	3	0.96	80	3	96.25	74	96.1039	48.3974	0
									gRNA[dsx]#2♀. +/+	113	5	0.955752	109	5	95.4128	98	94.2308		0
									gRNA[dsx]#2♀. +/+	110	4	0.963636	119	8	93.2773	107	96.3964		0
									gRNA[dsx]#2♀. +/+	84	5	0.940476	89	5	94.382	80	95.2381		0
5 gRNA[dsx]#3/+♂ X 5 wt♀	480	96	84.507	433	90.2083	385	7.3903	80.2083	gRNA[dsx]#3♂/+	117	6	0.948718	88	3	96.5909	81	95.2941	54.2857	0
5 gRNA[dsx]#3/+♂ X 5 wt♀	577	115.4	101.585	538	93.2409	475	8.73606	82.3224	gRNA[dsx]#3♂/+	119	4	0.966387	116	4	96.5517	110	98.2143	49.8947	0
5 gRNA[dsx]#3/+♂ X 5 wt♀	528	105.6	92.9577	478	90.5303	419	8.159	79.3561	gRNA[dsx]#3♂/+	109	5	0.954128	102	5	95.098	95	97.9381	49.8807	0
									gRNA[dsx]#3♂. +/+	101	3	0.970297	95	4	95.7895	88	96.7033		0
									gRNA[dsx]#3♂. +/+	125	3	0.976	131	5	96.1832	124	98.4127		0
									gRNA[dsx]#3♂. +/+	110	5	0.954545	118	5	95.7627	109	96.4602		0
5 wt♂ X 5 gRNA[dsx]#3/+♀	427	85.4	75.1761	402	94.1452	350	9.20398	81.9672	gRNA[dsx]#3♀/+	86	5	0.94186	91	4	95.6044	86	98.8506	50	0
5 wt♂ X 5 gRNA[dsx]#3/+♀	499	99.8	87.8521	461	92.3848	413	5.20607	82.7655	gRNA[dsx]#3♀/+	107	5	0.953271	118	8	93.2203	110	100	49.8789	0
5 wt♂ X 5 gRNA[dsx]#3/+♀	478	95.6	84.1549	427	89.3305	379	6.79157	79.2887	gRNA[dsx]#3♀/+	95	4	0.957895	103	6	94.1748	93	95.8763	50.9235	0
									gRNA[dsx]#3♀. +/+	97	3	0.969072	91	3	96.7033	88	100		0
									gRNA[dsx]#3♀. +/+	108	4	0.962963	104	7	93.2692	95	97.9381		0
									gRNA[dsx]#3♀. +/+	106	4	0.962264	94	5	94.6809	86	96.6292		0
5 gRNA[dsx]#1/+♂ X 5 nup50-Cas9/nup50-Cas9♀	481	96.2	84.6831	430	89.3971	340	8.93204	70.6861	gRNA[dsx]#1♂/+;Cas9♀/+	98	5	0.94898	0	0		0		52.6471	103	29	0.281553	74	71.8447	40	54.0541	51	1.275	1.12236	0	0	493	86.7958	450	91.2779
5 gRNA[dsx]#1/+♂ X 5 nup50-Cas9/nup50-Cas9♀	398	79.6	70.0704	349	87.6884	280	9.4382	70.3518	gRNA[dsx]#1♂/+;Cas9♀/+	92	3	0.967391	0	0		0		58.2143	76	15	0.197368	61	80.2632	29	47.541	8	0.275862	0.242836	0	0	513	90.3169	434	84.6004
5 gRNA[dsx]#1/+♂ X 5 nup50-Cas9/nup50-Cas9♀	453	90.6	79.7535	404	89.1832	315	11.499	69.5364	gRNA[dsx]#1♂/+;Cas9♀/+	88	4	0.954545	0	0		0		50.7937	80	19	0.2375	61	76.25	31	50.8197	37	1.19355	1.05066	0	0	437	76.9366	387	88.5584
									gRNA[dsx]#1♂. +/+;Cas9♀/+	91	5	0.945055	92	5	94.5652	84	96.5517
									gRNA[dsx]#1♂. +/+;Cas9♀/+	78	4	0.948718	61	5	91.8033	53	94.6429
									gRNA[dsx]#1♂. +/+;Cas9♀/+	83	7	0.915663	97	3	96.9072	90	95.7447
5 Nup50-Cas9/Nup50-Cas9♂ X 5 gRNA[dsx]#1/+♀	429	85.8	75.5282	366	85.3147	298	10.1877	69.4639	gRNA[dsx]#1♀/+;Cas9♂/+	84	5	0.940476	0	0		0		53.0201	85	18	0.211765	67	78.8235	37	55.2239	7	0.189189	0.16654	0	0	586	103.169	519	88.5666
5 Nup50-Cas9/Nup50-Cas9♂ X 5 gRNA[dsx]#1/+♀	461	92.2	81.162	385	83.5141	314	8.96686	68.1128	gRNA[dsx]#1♀/+;Cas9♂/+	86	3	0.965116	0	0		0		55.0955	79	14	0.177215	65	82.2785	33	50.7692	19	0.575758	0.506829	0	0	483	85.0352	445	92.1325
5 Nup50-Cas9/Nup50-Cas9♂ X 5 gRNA[dsx]#1/+♀	513	102.6	90.3169	463	90.2534	354	17.5214	69.0058	gRNA[dsx]#1♀/+;Cas9♂/+	98	3	0.969388	0	0		0		53.3898	91	15	0.164835	76	83.5165	36	47.3684	25	0.694444	0.611307	0	0	526	92.6056	480	91.2548
									gRNA[dsx]#1♀. +/+;Cas9♂/+	82	3	0.963415	77	4	94.8052	73	100
									gRNA[dsx]#1♀. +/+;Cas9♂/+	94	4	0.957447	80	4	95	75	98.6842
									gRNA[dsx]#1♀. +/+;Cas9♂/+	99	5	0.949495	93	4	95.6989	86	96.6292
5 gRNA[dsx]#2/+♂ X 5 nup50-Cas9/nup50-Cas9♀	533	106.6	93.838	469	87.9925	377	9.03491	70.7317	gRNA[dsx]#2♂/+;Cas9♀/+	113	6	0.946903	0	0		0		51.7241	106	25	0.235849	81	76.4151	43	53.0864	22	0.511628	0.450377	0	0	505	88.9085	461	91.2871
5 gRNA[dsx]#2/+♂ X 5 nup50-Cas9/nup50-Cas9♀	520	104	91.5493	438	84.2308	371	6.28272	71.3462	gRNA[dsx]#2♂/+;Cas9♀/+	88	5	0.943182	0	0		0		56.6038	69	16	0.231884	53	76.8116	26	49.0566	25	0.961538	0.846425	0	0	466	82.0423	432	92.7039
5 gRNA[dsx]#2/+♂ X 5 nup50-Cas9/nup50-Cas9♀	417	83.4	73.4155	353	84.6523	282	9.30233	67.6259	gRNA[dsx]#2♂/+;Cas9♀/+	85	3	0.964706	0	0		0		51.0638	81	12	0.148148	69	85.1852	31	44.9275	30	0.967742	0.851886	0	0	495	87.1479	426	86.0606
									gRNA[dsx]#2♂. +/+;Cas9♀/+	94	6	0.93617	112	11	90.1786	100	99.0099
									gRNA[dsx]#2♂. +/+;Cas9♀/+	131	4	0.969466	114	6	94.7368	103	95.3704
									gRNA[dsx]#2♂. +/+;Cas9♀/+	65	3	0.953846	74	5	93.2432	64	92.7536
5 Nup50-Cas9/Nup50-Cas9♂ X 5 gRNA[dsx]#2/+♀	522	104.4	91.9014	461	88.3142	344	18.7364	65.9004	gRNA[dsx]#2♀/+;Cas9♂/+	95	3	0.968421	0	0		0		50	101	19	0.188119	82	81.1881	37	45.122	52	1.40541	1.23715	0	0	521	91.7254	488	93.666
5 Nup50-Cas9/Nup50-Cas9♂ X 5 gRNA[dsx]#2/+♀	413	82.6	72.7113	367	88.862	305	4.89978	73.8499	gRNA[dsx]#2♀/+;Cas9♂/+	86	7	0.918605	0	0		0		50.1639	96	20	0.208333	76	79.1667	32	42.1053	29	0.90625	0.797755	0	0	499	87.8521	454	90.982
5 Nup50-Cas9/Nup50-Cas9♂ X 5 gRNA[dsx]#2/+♀	464	92.8	81.6901	404	87.069	320	12.1127	68.9655	gRNA[dsx]#2♀/+;Cas9♂/+	96	5	0.947917	0	0		0		52.5	105	19	0.180952	86	81.9048	43	50	47	1.09302	0.962168	0	0	437	76.9366	401	91.762
									gRNA[dsx]#2♀. +/+;Cas9♂/+	85	5	0.941176	94	4	95.7447	85	94.4444
									gRNA[dsx]#2♀. +/+;Cas9♂/+	81	7	0.91358	82	6	92.6829	73	96.0526
									gRNA[dsx]#2♀. +/+;Cas9♂/+	84	7	0.916667	76	10	86.8421	62	93.9394
5 gRNA[dsx]#3/+♂ X 5 nup50-Cas9/nup50-Cas9♀	453	90.6	79.7535	414	91.3907	326	10.6236	71.9647	gRNA[dsx]#3♂/+;Cas9♀/+	103	6	0.941748	0	0		0		57.9755	88	23	0.261364	65	73.8636	30	46.1538	39	1.3	1.14437	0	0	518	91.1972	452	87.2587
5 gRNA[dsx]#3/+♂ X 5 nup50-Cas9/nup50-Cas9♀	398	79.6	70.0704	360	90.4523	293	3.71747	73.6181	gRNA[dsx]#3♂/+;Cas9♀/+	82	10	0.878049	0	0		0		53.2423	76	27	0.355263	49	64.4737	28	57.1429	24	0.857143	0.754527	0	0	533	93.838	476	89.3058
5 gRNA[dsx]#3/+♂ X 5 nup50-Cas9/nup50-Cas9♀	412	82.4	72.5352	367	89.0777	285	6.90377	69.1748	gRNA[dsx]#3♂/+;Cas9♀/+	87	5	0.942529	0	0		0		59.2982	73	36	0.493151	37	50.6849	19	51.3514	33	1.73684	1.52891	0	0	498	87.6761	449	90.1606
									gRNA[dsx]#3♂. +/+;Cas9♀/+	96	4	0.958333	81	9	88.8889	70	97.2222		0
									gRNA[dsx]#3♂. +/+;Cas9♀/+	89	5	0.94382	93	5	94.6237	88	100
									gRNA[dsx]#3♂. +/+;Cas9♀/+	90	3	0.966667	84	5	94.0476	76	96.2025
5 Nup50-Cas9/Nup50-Cas9♂ X 5 gRNA[dsx]#3/+♀	487	97.4	85.7394	429	88.0903	336	14.4279	68.9938	gRNA[dsx]#3♀/+;Cas9♂/+	98	4	0.959184	0	0		0		54.7619	83	25	0.301205	58	69.8795	32	55.1724	21	0.65625	0.577685	0	0	483	85.0352	407	0.84265
5 Nup50-Cas9/Nup50-Cas9♂ X 5 gRNA[dsx]#3/+♀	408	81.6	71.831	346	84.8039	265	9.32755	64.951	gRNA[dsx]#3♀/+;Cas9♂/+	70	3	0.957143	0	0		0		50.1887	85	26	0.305882	59	69.4118	31	52.5424	48	1.54839	1.36302	0	0	450	79.2254	411	0.913333
5 Nup50-Cas9/Nup50-Cas9♂ X 5 gRNA[dsx]#3/+♀	485	97	85.3873	430	88.6598	316	17.5644	65.1546	gRNA[dsx]#3♀/+;Cas9♂/+	98	8	0.918367	0	0		0		53.481	90	24	0.266667	66	73.3333	39	59.0909	25	0.641026	0.564283	0	0	473	83.2746	415	0.877378
									gRNA[dsx]#3♀. +/+;Cas9♂/+	94	4	0.957447	96	2	97.9167	94	100
									gRNA[dsx]#3♀. +/+;Cas9♂/+	70	4	0.942857	78	5	93.5897	70	95.8904
									gRNA[dsx]#3♀. +/+;Cas9♂/+	82	3	0.963415	85	4	95.2941	78	96.2963
5 wt♂ X 5 gRNA[ix]#2♀	446	89.2	78.5211	414	92.8251	330	17.1498	73.991	gRNA[ix]#2♀/+	88	3	0.965909	78	3	96.1538	73	97.3333	52.1212	0
5 wt♂ X 5 gRNA[ix]#2♀	428	85.6	75.3521	384	89.7196	306	14.5833	71.4953	gRNA[ix]#2♀/+	85	7	0.917647	76	6	92.1053	65	92.8571	52.2876	0
									gRNA[ix]#2♀. +/+	108	5	0.953704	106	5	95.283	98	97.0297		0
									gRNA[ix]#2♀. +/+	92	5	0.945652	85	2	97.6471	80	96.3855		0
									gRNA[ix]#2♀. +/+	86	4	0.953488	81	5	93.8272	72	94.7368		0
5 gRNA[ix]#3♂ X 5 wt♀	425	85	74.8239	405	95.2941	335	13.8272	78.8235	gRNA[ix]#3♂/+	87	3	0.965517	91	4	95.6044	85	97.7011	48.9552	0
5 gRNA[ix]#3♂ X 5 wt♀	472	94.4	83.0986	446	94.4915	360	15.4709	76.2712	gRNA[ix]#3♂/+	96	6	0.9375	94	5	94.6809	82	92.1348	49.1667	0
5 gRNA[ix]#3♂ X 5 wt♀	557	111.4	98.0634	487	87.4327	426	6.3655	76.4811	gRNA[ix]#3♂/+	111	4	0.963964	104	7	93.2692	95	97.9381	51.8779	0
									gRNA[ix]#3♂. +/+	83	3	0.963855	88	4	95.4545	82	97.619		0
									gRNA[ix]#3♂. +/+	89	2	0.977528	98	4	95.9184	92	97.8723		0
									gRNA[ix]#3♂. +/+	125	11	0.912	116	8	93.1034	104	96.2963		0
5 wt♂ X 5 gRNA[ix]#3♀	449	89.8	79.0493	425	94.6548	381	4	84.8552	gRNA[ix]#3♀/+	102	7	0.931373	94	5	94.6809	86	96.6292	53.5433	0
5 wt♂ X 5 gRNA[ix]#3♀	491	98.2	86.4437	465	94.7047	383	12.6882	78.0041	gRNA[ix]#3♀/+	98	11	0.887755	103	3	97.0874	94	94	48.564	0
5 wt♂ X 5 gRNA[ix]#3♀	580	116	102.113	557	96.0345	461	10.772	79.4828	gRNA[ix]#3♀/+	133	8	0.93985	119	7	94.1176	109	97.3214	49.8915	0
									gRNA[ix]#3♀. +/+	115	6	0.947826	97	9	90.7216	82	93.1818		0
									gRNA[ix]#3♀. +/+	104	5	0.951923	101	4	96.0396	94	96.9072		0
									gRNA[ix]#3♀. +/+	116	11	0.905172	129	10	92.2481	110	92.437		0
5 gRNA[ix]#1/+♂ X 5 nup50-Cas9/nup50-Cas9♀	357	71.4	62.8521	299	83.7535	262	3.68764	73.3894	gRNA[ix]#1♂/+;Cas9♀/+	75	5	0.933333	0	0		0		50.7634	69	10	0.144928	59	85.5072	30	50.8475	2139	71.3	62.7641	1873	87.5643	457	80.4577	421	92.1225
5 gRNA[ix]#1/+♂ X 5 nup50-Cas9/nup50-Cas9♀	565	113	99.4718	488	86.3717	432	8.99183	76.4602	gRNA[ix]#1♂/+;Cas9♀/+	108	3	0.972222	0	0		0		48.6111	113	12	0.106195	101	89.3805	63	62.3762	3763	59.7302	52.5794	3215	85.4372	503	88.5563	459	91.2525
5 gRNA[ix]#1/+♂ X 5 nup50-Cas9/nup50-Cas9♀	512	102.4	90.1408	433	84.5703	337	17.3267	65.8203	gRNA[ix]#1♂/+;Cas9♀/+	90	6	0.933333	0	0		0		53.1157	89	14	0.157303	75	84.2697	45	60	3020	67.1111	59.0767	2612	86.4901	528	92.9577	484	91.6667
									gRNA[ix]#1♂. +/+;Cas9♀/+	65	2	0.969231	73	3	95.8904	68	97.1429
									gRNA[ix]#1♂. +/+;Cas9♀/+	109	4	0.963303	125	4	96.8	117	96.6942
									gRNA[ix]#1♂. +/+;Cas9♀/+	98	3	0.969388	86	3	96.5116	81	97.5904
5 nup50-Cas9/nup50-Cas9♂ X 5 gRNA[ix]#1/+♀	505	101	88.9085	458	90.6931	397	6.28019	78.6139	gRNA[ix]#1♀/+;Cas9♂/+	114	12	0.894737	0	0		0		51.1335	96	15	0.15625	81	84.375	47	58.0247	3476	73.9574	65.1034	3107	89.3843	553	97.3592	487	88.0651
5 nup50-Cas9/nup50-Cas9♂ X 5 gRNA[ix]#1/+♀	554	110.8	97.5352	486	87.7256	372	24.4444	67.148	gRNA[ix]#1♀/+;Cas9♂/+	90	4	0.955556	0	0		0		53.2258	87	16	0.183908	71	81.6092	40	56.338	3162	79.05	69.5863	2528	79.9494	516	90.8451	472	91.4729
5 nup50-Cas9/nup50-Cas9♂ X 5 gRNA[ix]#1/+♀	507	101.4	89.2606	442	87.1795	375	7.90191	73.9645	gRNA[ix]#1♀/+;Cas9♂/+	103	7	0.932039	0	0		0		53.3333	91	19	0.208791	72	79.1209	42	58.3333	2778	66.1429	58.2243	2121	76.3499	437	76.9366	369	84.4394
									gRNA[ix]#1♀. +/+;Cas9♂/+	105	4	0.961905	117	4	96.5812	110	97.3451
									gRNA[ix]#1♀. +/+;Cas9♂/+	115	3	0.973913	106	3	97.1698	101	98.0583
									gRNA[ix]#1♀. +/+;Cas9♂/+	110	6	0.945455	109	6	94.4954	102	99.0291
5 gRNA[ix]#2/+♂ X 5 nup50-Cas9/nup50-Cas9♀	472	94.4	83.0986	387	81.9915	320	9.79021	67.7966	gRNA[ix]#2♂/+;Cas9♀/+	82	4	0.95122	0	0		0		53.4375	90	15	0.166667	75	83.3333	45	60	2572	57.1556	50.313	1967	76.4774	556	97.8873	477	85.7914
5 gRNA[ix]#2/+♂ X 5 nup50-Cas9/nup50-Cas9♀	443	88.6	77.993	369	83.2957	305	10.9827	68.8488	gRNA[ix]#2♂/+;Cas9♀/+	79	4	0.949367	0	0		0		52.1311	83	17	0.204819	66	79.5181	37	56.0606	2401	64.8919	57.1231	1981	82.5073	452	79.5775	416	92.0354
5 gRNA[ix]#2/+♂ X 5 nup50-Cas9/nup50-Cas9♀	480	96	84.507	425	88.5417	331	14.4186	68.9583	gRNA[ix]#2♂/+;Cas9♀/+	104	7	0.932692	0	0		0		51.6616	108	21	0.194444	87	80.5556	44	50.5747	3015	68.5227	60.3193	2510	83.2504	428	75.3521	365	85.2804
									gRNA[ix]#2♂. +/+;Cas9♀/+	96	3	0.96875	77	3	96.1039	92	124.324
									gRNA[ix]#2♂. +/+;Cas9♀/+	86	2	0.976744	83	3	96.3855	78	97.5
									gRNA[ix]#2♂. +/+;Cas9♀/+	77	3	0.961039	74	1	98.6486	70	95.8904
5 nup50-Cas9/nup50-Cas9♂ X 5 gRNA[ix]#2/+♀	511	102.2	89.9648	451	88.2583	375	#DIV/0!	73.3855	gRNA[ix]#2♀/+;Cas9♂/+	115	6	0.947826	0	0		0		51.2	119	17	0.142857	102	85.7143	49	48.0392	3578	73.0204	64.2785	3143	87.8424	418	73.5915	360	86.1244
5 nup50-Cas9/nup50-Cas9♂ X 5 gRNA[ix]#2/+♀	438	87.6	77.1127	380	86.758	302	13.0435	68.9498	gRNA[ix]#2♀/+;Cas9♂/+	85	5	0.941176	0	0		0		50.9934	82	10	0.121951	72	87.8049	45	62.5	3152	70.0444	61.6588	2686	85.2157	503	88.5563	461	91.6501
5 nup50-Cas9/nup50-Cas9♂ X 5 gRNA[ix]#2/+♀	472	94.4	83.0986	422	89.4068	341	11.9792	72.2458	gRNA[ix]#2♀/+;Cas9♂/+	93	5	0.946237	0	0		0		52.7859	88	14	0.159091	74	84.0909	42	56.7568	3150	75	66.0211	2524	80.127	572	100.704	539	94.2308
									gRNA[ix]#2♀. +/+;Cas9♂/+	89	6	0.932584	86	5	94.186	78	96.2963
									gRNA[ix]#2♀. +/+;Cas9♂/+	78	4	0.948718	81	5	93.8272	75	98.6842
									gRNA[ix]#2♀. +/+;Cas9♂/+	101	9	0.910891	94	7	92.5532	84	96.5517
5 gRNA[ix]#3/+♂ X 5 nup50-Cas9/nup50-Cas9♀	578	115.6	101.761	491	84.9481	400	15.3086	69.2042	gRNA[ix]#3♂/+;Cas9♀/+	98	5	0.94898	0	0		0		48.5	105	17	0.161905	88	83.8095	48	54.5455	2884	60.0833	52.8903	2472	85.7143	455	80.1056	407	89.4505
5 gRNA[ix]#3/+♂ X 5 nup50-Cas9/nup50-Cas9♀	539	107.8	94.8944	450	83.4879	347	15.4709	64.3785	gRNA[ix]#3♂/+;Cas9♀/+	92	4	0.956522	0	0		0		53.0259	95	22	0.231579	73	76.8421	46	63.0137	2528	54.9565	48.3772	2063	81.606	463	81.5141	399	86.1771
5 gRNA[ix]#3/+♂ X 5 nup50-Cas9/nup50-Cas9♀	459	91.8	80.8099	385	83.878	293	12.5257	63.8344	gRNA[ix]#3♂/+;Cas9♀/+	85	5	0.941176	0	0		0		53.9249	76	17	0.223684	59	77.6316	39	66.1017	2694	69.0769	60.8072	2111	78.3593	529	93.1338	474	89.603
									gRNA[ix]#3♂. +/+;Cas9♀/+	105	4	0.961905	121	3	97.5207	112	94.9153
									gRNA[ix]#3♂. +/+;Cas9♀/+	101	5	0.950495	93	3	96.7742	85	94.4444
									gRNA[ix]#3♂. +/+;Cas9♀/+	82	4	0.95122	81	5	93.8272	76	100
5 nup50-Cas9/nup50-Cas9♂ X 5 gRNA[ix]#3/+♀	429	85.8	75.5282	353	82.2844	298	5.41176	69.4639	gRNA[ix]#3♀/+;Cas9♂/+	81	9	0.888889	0	0	#DIV/0!	0		50.3356	82	13	0.158537	69	84.1463	46	66.6667	2835	61.6304	54.2521	2420	85.3616	536	94.3662	478	89.1791
5 nup50-Cas9/nup50-Cas9♂ X 5 gRNA[ix]#3/+♀	436	87.2	76.7606	385	88.3028	265	20.4301	60.7798	gRNA[ix]#3♀/+;Cas9♂/+	82	7	0.914634	0	0	#DIV/0!	0		53.5849	69	7	0.101449	62	89.8551	34	54.8387	2516	74	65.1408	2133	84.7774	492	86.6197	453	92.0732
5 nup50-Cas9/nup50-Cas9♂ X 5 gRNA[ix]#3/+♀	548	109.6	96.4789	487	88.8686	387	12.0287	70.6204	gRNA[ix]#3♀/+;Cas9♂/+	106	6	0.943396	0	0	#DIV/0!	0		50.1292	112	17	0.151786	95	84.8214	44	46.3158	2673	60.75	53.4771	2309	86.3823	411	72.3592	368	89.5377
									gRNA[ix]#3♀. +/+;Cas9♂/+	83	5	0.939759	84	5	94.0476	78	98.7342
									gRNA[ix]#3♀. +/+;Cas9♂/+	74	7	0.905405	65	4	93.8462	61	100
									gRNA[ix]#3♀. +/+;Cas9♂/+	99	5	0.949495	103	5	95.1456	96	97.9592
Statistical analysis
Class	♀ blood taking rate	Statistics	Normalized number of laid eggs per ♀ laid	Statistics	Egg Hatching rate	Statistics	Normalized number of eggs per one wt ♀ mated with 5 F1 ♂	Statistics	Statistics	Hatched eggs % by (5 wt ♀ X 5 F1 ♂)	Statistics	Statistics
+/+	95.1613	97.4903	100	93.8967	95.9507	95.491		93.8967			95.491
+/+	98.2759	2.0523	93.1338	5.75985	94.896	0.540189		5.75985			0.540189
+/+	99.0338		88.5563		95.6262
5 nup50-Cas9/nup50-Cas♂ X 5 wt♀			78.8732	88.0282	89.9554	92.6022			88.0282			92.6022
5 nup50-Cas9/nup50-Cas♂ X 5 wt♀			90.669	8.1615	94.3689	2.33471			8.1615			2.33471
5 nup50-Cas9/nup50-Cas♂ X 5 wt♀			94.5423		93.4823
gRNA[dsx]#1♂/+;Cas9♀/+	54.0541	50.9627	1.12236	0.616755	0	0	86.7958	89.1432	89.1432	91.2779	89.3984	89.3984
gRNA[dsx]#1♂/+;Cas9♀/+	47.541	3.23725	0.242836	0.399632	0	0	90.3169	8.73471	8.73471	84.6004	2.78828	2.78828
gRNA[dsx]#1♂/+;Cas9♀/+	50.8197		1.05066		0		76.9366			88.5584
gRNA[dsx]#1♀/+;Cas9♂/+	55.2239		0.16654		0		103.169			88.5666
gRNA[dsx]#1♀/+;Cas9♂/+	50.7692		0.506829		0		85.0352			92.1325
gRNA[dsx]#1♀/+;Cas9♂/+	47.3684	P < 0.0001	0.611307	P < 0.0001	0	P < 0.0001	92.6056	P = 0.4284	P = 0.8591	91.2548	P = 0.0084	P = 0.1327
5 nup50-Cas9/nup50-Cas♂ X 5 wt♀			78.8732	88.0282	89.9554	92.6022			88.0282			92.6022
5 nup50-Cas9/nup50-Cas♂ X 5 wt♀			90.669	8.1615	94.3689	2.33471			8.1615			2.33471
5 nup50-Cas9/nup50-Cas♂ X 5 wt♀			94.5423		93.4823
gRNA[ix]#1♂/+;Cas9♀/+	50.8475	57.6533	62.7641	61.2224	87.5643	84.1959	80.4577	87.8521	89.1432	92.1225	89.8365	89.3984
gRNA[ix]#1♂/+;Cas9♀/+	62.3762	3.91057	52.5794	5.92769	85.4372	4.99325	88.5563	7.74248	8.73471	91.2525	3.01746	2.78828
gRNA[ix]#1♂/+;Cas9♀/+	60		59.0767		86.4901		92.9577			91.6667
gRNA[ix]#1♀/+;Cas9♂/+	58.0247		65.1034		89.3843		97.3592			88.0651
gRNA[ix]#1♀/+;Cas9♂/+	56.338		69.5863		79.9494		90.8451			91.4729
gRNA[ix]#1♀/+;Cas9♂/+	58.3333	P < 0.0001	58.2243	P < 0.0001	76.3499	P = 0.0069	76.9366	P = 0.2759	P = 0.9762	84.4394	P = 0.0169	P = 0.2104
Student t test with equal variance

## Sheet: Supp Table 4
Supplementary Table 4. Data from pgSIT genetic cross: dsx, ix and ​​βTub simultaneous gene disruption
Tets group	Egg #	Number of eggs per ♀ laid	Normalized number of laid eggs per ♀ %	Hatched egg #	Hatching rate %	Adult#	Larval death %	egg-to adult survival %	F1 progeny	♂ pupa #	♂ pupal eclosion death	♂ pupa-adult survival %	♀ pupa #	♀ pupal eclosion death#	♀ pupa-adult survival %	Blood taking ♀	♀ blood taking rate	♂ adult %	♀ adult %	⚥#	⚥ pupal eclosion death	Survival ⚥#	⚥ pupal-adult death%	⚥ adult %	⚥ # took blood	⚥ blood taking rate	Eggs by (F1 ⚥ X 50 wt ♂)	Normalized number of laid eggs per ⚥	Hatched eggs by (F1 ⚥ X 50 wt ♂)	F1 ⚥ Fertility = Hatched eggs % by (F1 ⚥ X 50 wt ♂)	Eggs by (50 wt ♀ X 50 F1 ♂)	Hatch eggs by (50 wt ♀ X 50 F1 ♂	F1 ♂ Fertility = Hatched eggs % by (50 wt ♀ X 50 F1 ♂)
50 wt♂ X 50 wt♀	4593	91.86	85.8024	4382	95.4061	3896	6.75491	84.8247	+/+	2024	106	94.7628	2062	84	95.9263	1905	0.963094	49.23	50.77	0											4911	4735	96.4162
50 wt♂ X 50 wt♀	5018	100.36	93.7418	4819	96.0343	4273	6.1631	85.1534	+/+	2329	137	94.1176	2193	112	94.8928	2032	0.976454	51.2989	48.7011	0											4627	4419	95.5046
50 wt♂ X 50 wt♀	4322	86.44	80.7398	4168	96.4368	3446	11.9722	79.7316	+/+	1793	95	94.7016	1876	128	93.177	1662	0.950801	49.2745	50.7255	0											4749	4468	94.083
50 nup50-Cas9/nup50-Cas9♂ X 50 wt♀	4473	89.46	83.5606	4025	89.9844	3484	7.42857	77.8896	Cas9♂/+	1902	117	93.8486	1824	125	93.1469	1602	0.942908	51.2342	48.7658	0											4015	3761	93.6737
50 nup50-Cas9/nup50-Cas9♂ X 50 wt♀	4609	92.18	86.1013	3971	86.1575	3311	9.89675	71.8377	Cas9♂/+	1723	128	92.5711	1855	139	92.5067	1648	0.960373	48.1728	51.8272	0											3982	3557	89.327
50 nup50-Cas9/nup50-Cas9♂ X 50 wt♀	4028	80.56	75.2475	3652	90.6653	3032	9.83023	75.2731	Cas9♂/+	1694	133	92.1488	1599	128	91.995	1419	0.96465	51.4842	48.5158	0											4113	3895	94.6997
50 wt♂ X 50 nup50-Cas9/nup50-Cas9♀	3523	70.46	65.8136	2875	81.6066	2371	11.2696	67.3006	Cas9♀/+	1255	96	92.3506	1296	84	93.5185	1177	0.971122	48.8823	51.1177	0											3874	3289	84.8993
50 wt♂ X 50 nup50-Cas9/nup50-Cas9♀	3619	72.38	67.6069	3028	83.6695	2256	19.2536	62.3377	Cas9♀/+	1298	117	90.9861	1147	72	93.7228	998	0.928372	52.3493	47.6507	0											3799	3347	88.1021
50 wt♂ X 50 nup50-Cas9/nup50-Cas9♀	3184	63.68	59.4807	2763	86.7776	2280	10.4235	71.608	Cas9♀/+	1206	90	92.5373	1269	105	91.7258	1091	0.937285	48.9474	51.0526	0											3515	3192	90.8108
50 gRNA[dsx+ix+βTub]#1♂ X 50 wt♀	4930	98.6	92.0979	4421	89.6755	3616	12.599	73.3469	gRNA[dsx+ix+βTub]#1♂/+	1890	108	94.2857	1974	140	92.9078	1752	0.955289	49.281	50.719	0											4352	3997	91.8428
50 gRNA[dsx+ix+βTub]#1♂ X 50 wt♀	5353	107.06	100	4779	89.277	3837	13.5593	71.6794	gRNA[dsx+ix+βTub]#1♂/+	2013	153	92.3994	2118	141	93.3428	1859	0.940314	48.4754	51.5246	0											3675	3314	90.1769
50 gRNA[dsx+ix+βTub]#1♂ X 50 wt♀	5028	100.56	93.9286	4238	84.288	3473	12.3407	69.0732	gRNA[dsx+ix+βTub]#1♂/+	1914	122	93.6259	1801	120	93.337	1611	0.958358	51.598	48.402	0											4696	4267	90.8646
50 gRNA[dsx+ix+βTub]#2♂ X 50 wt♀	4471	89.42	83.5233	3874	86.6473	3285	8.72483	73.4735	gRNA[dsx+ix+βTub]#2♂/+	1811	132	92.7112	1725	119	93.1014	1548	0.963885	51.1111	48.8889	0											4762	4053	85.1113
50 gRNA[dsx+ix+βTub]#2♂ X 50 wt♀	4874	97.48	91.0517	4317	88.572	3660	9.31202	75.0923	gRNA[dsx+ix+βTub]#2♂/+	1989	119	94.0171	1926	136	92.9387	1707	0.953631	51.0929	48.9071	0											4055	3655	90.1356
50 gRNA[dsx+ix+βTub]#2♂ X 50 wt♀	5199	103.98	97.1231	4526	87.0552	3577	14.4498	68.8017	gRNA[dsx+ix+βTub]#2♂/+	1849	133	92.8069	2023	162	91.9921	1738	0.933907	47.9732	52.0268	0											4370	3851	88.1236
50 gRNA[dsx+ix+βTub]#3♂ X 50 wt♀	4697	93.94	87.7452	4142	88.1839	3548	9.2226	75.5376	gRNA[dsx+ix+βTub]#3♂/+	2014	117	94.1907	1746	95	94.559	1523	0.922471	53.4667	46.5333	0											2983	2653	88.9373
50 gRNA[dsx+ix+βTub]#3♂ X 50 wt♀	4629	92.58	86.4749	4048	87.4487	3327	11.7342	71.873	gRNA[dsx+ix+βTub]#3♂/+	1728	128	92.5926	1845	118	93.6043	1625	0.940938	48.0914	51.9086	0											3517	3072	87.3472
50 gRNA[dsx+ix+βTub]#3♂ X 50 wt♀	4537	90.74	84.7562	3784	83.4031	3138	10.9672	69.1646	gRNA[dsx+ix+βTub]#3♂/+	1647	107	93.5033	1722	124	92.7991	1496	0.93617	49.0758	50.9242	0											3762	3418	90.8559
50 WT ♂ X 50 gRNA[dsx+ix+βTub]#1♀	3870	77.4	72.2959	3167	81.8346	2625	12.5039	67.8295	gRNA[dsx+ix+βTub]#1♀/+	1345	67	95.0186	1426	79	94.46	1256	0.932442	48.6857	51.3143	0											3379	2894	85.6466
50 WT ♂ X 50 gRNA[dsx+ix+βTub]#1♀	3583	71.66	66.9344	3105	86.6592	2564	13.0113	71.5601	gRNA[dsx+ix+βTub]#1♀/+	1319	72	94.5413	1382	65	95.2967	1272	0.965831	48.6349	51.3651	0											2985	2611	87.4707
50 WT ♂ X 50 gRNA[dsx+ix+βTub]#1♀	3075	61.5	57.4444	2624	85.3333	2218	11.6616	72.1301	gRNA[dsx+ix+βTub]#1♀/+	1103	47	95.7389	1215	53	95.6379	1123	0.966437	47.6105	52.3895	0											3018	2685	88.9662
50 WT ♂ X 50 gRNA[dsx+ix+βTub]#2♀	3627	72.54	67.7564	3068	84.5878	2474	13.7549	68.2106	gRNA[dsx+ix+βTub]#2♀/+	1337	84	93.7173	1309	88	93.2773	1168	0.956593	50.6467	49.3533	0											4105	3642	88.7211
50 WT ♂ X 50 gRNA[dsx+ix+βTub]#2♀	4128	82.56	77.1156	3382	81.9283	2846	10.7924	68.9438	gRNA[dsx+ix+βTub]#2♀/+	1556	93	94.0231	1461	78	94.6612	1318	0.953001	51.4055	48.5945	0											3762	3107	82.589
50 WT ♂ X 50 gRNA[dsx+ix+βTub]#2♀	4279	85.58	79.9365	3425	80.0421	2672	16.4672	62.4445	gRNA[dsx+ix+βTub]#2♀/+	1537	108	92.9733	1324	81	93.8822	1179	0.948512	53.4805	46.5195	0											3328	2865	86.0877
50 WT ♂ X 50 gRNA[dsx+ix+βTub]#3♀	4036	80.72	75.397	3384	83.8454	2668	16.0461	66.1051	gRNA[dsx+ix+βTub]#3♀/+	1503	80	94.6773	1338	93	93.0493	1194	0.959036	53.3358	46.6642	0											3415	3007	88.0527
50 WT ♂ X 50 gRNA[dsx+ix+βTub]#3♀	3951	79.02	73.8091	3296	83.4219	2628	15.2913	66.5148	gRNA[dsx+ix+βTub]#3♀/+	1377	84	93.8998	1415	80	94.3463	1286	0.963296	49.2009	50.7991	0											3680	3166	86.0326
50 WT ♂ X 50 gRNA[dsx+ix+βTub]#3♀	4006	80.12	74.8365	3343	83.4498	2621	16.6617	65.4269	gRNA[dsx+ix+βTub]#3♀/+	1408	91	93.5369	1378	74	94.6299	1224	0.93865	50.248	49.752	0											2953	2592	87.7751
50 gRNA[dsx+ix+βTub]#1/gRNA[dsx+ix+βTub]#1♂ X 50 nup50-Cas9/nup50-Cas9♀	3328	66.56	62.1707	2482	74.5793	527	58.9041	15.8353	Cas9♀/+;gRNA[dsx+ix+βTub]#1♂/+	542	41	92.4354	0		0			95.0664	0	478	452	26	94.5607	4.93359	0	0	0	0	0	0	4643	0	0
50 gRNA[dsx+ix+βTub]#1/gRNA[dsx+ix+βTub]#1♂ X 50 nup50-Cas9/nup50-Cas9♀	3013	60.26	56.2862	2357	78.2277	400	61.6886	13.2758	Cas9♀/+;gRNA[dsx+ix+βTub]#1♂/+	418	36	91.3876	0		0			95.5	0	485	467	18	96.2887	4.5	0	0	0	0	0	0	4157	0	0
50 gRNA[dsx+ix+βTub]#1/gRNA[dsx+ix+βTub]#1♂ X 50 nup50-Cas9/nup50-Cas9♀	3752	75.04	70.0915	3135	83.5554	548	63.8915	14.6055	Cas9♀/+;gRNA[dsx+ix+βTub]#1♂/+	568	59	89.6127	0		0			92.8832	0	564	525	39	93.0851	7.11679	0	0	0	0	0	0	5281	293	5.54819
50 gRNA[dsx+ix+βTub]#2/gRNA[dsx+ix+βTub]#2♂ X 50 nup50-Cas9/nup50-Cas9♀	3579	71.58	66.8597	2683	74.9651	556	54.8267	15.5351	Cas9♀/+;gRNA[dsx+ix+βTub]#2♂/+	584	62	89.3836	0		0			93.8849	0	628	594	34	94.586	6.11511	0	0	0	0	0	0	4257	0	0
50 gRNA[dsx+ix+βTub]#2/gRNA[dsx+ix+βTub]#2♂ X 50 nup50-Cas9/nup50-Cas9♀	3875	77.5	72.3893	3116	80.4129	508	65.0513	13.1097	Cas9♀/+;gRNA[dsx+ix+βTub]#2♂/+	562	89	84.1637	0		0			93.1102	0	527	492	35	93.3586	6.88976	0	0	0	0	0	0	3872	0	0
50 gRNA[dsx+ix+βTub]#2/gRNA[dsx+ix+βTub]#2♂ X 50 nup50-Cas9/nup50-Cas9♀	3437	68.74	64.207	2854	83.0375	474	61.8781	13.7911	Cas9♀/+;gRNA[dsx+ix+βTub]#2♂/+	515	67	86.9903	0		0			94.5148	0	573	547	26	95.4625	5.48523	0	0	0	0	0	0	4158	122	2.9341
50 gRNA[dsx+ix+βTub]#3/gRNA[dsx+ix+βTub]#3♂ X 50 nup50-Cas9/nup50-Cas9♀	3625	72.5	67.719	2795	77.1034	596	56.8157	16.4414	Cas9♀/+;gRNA[dsx+ix+βTub]#3♂/+	646	75	88.3901	0		0			95.8054	0	561	536	25	95.5437	4.19463	0	0	0	0	0	0	3977	0	0
50 gRNA[dsx+ix+βTub]#3/gRNA[dsx+ix+βTub]#3♂ X 50 nup50-Cas9/nup50-Cas9♀	3024	60.48	56.4917	2493	82.4405	429	58.0425	14.1865	Cas9♀/+;gRNA[dsx+ix+βTub]#3♂/+	498	95	80.9237	0		0			93.9394	0	548	522	26	95.2555	6.06061	0	0	0	0	0	0	4479	27	0.602813
50 gRNA[dsx+ix+βTub]#3/gRNA[dsx+ix+βTub]#3♂ X 50 nup50-Cas9/nup50-Cas9♀	3761	75.22	70.2597	2986	79.3938	574	62.0228	15.2619	Cas9♀/+;gRNA[dsx+ix+βTub]#3♂/+	627	72	88.5167	0		0			96.6899	0	507	488	19	96.2525	3.3101	0	0	0	0	0	0	4370	0	0
50 nup50-Cas9/nup50-Cas9♂ X 50 gRNA[dsx+ix+βTub]#1/gRNA[dsx+ix+βTub]#1♀	3438	68.76	64.2257	2844	82.7225	1015	24.3319	29.523	Cas9♂/+;gRNA[dsx+ix+βTub]#1♀/+	1110	139	87.4775	0		0			95.665	0	1042	998	44	95.7774	4.33498	7	15.9091	32	4.26997	0	0	4761	0	0
50 nup50-Cas9/nup50-Cas9♂ X 50 gRNA[dsx+ix+βTub]#1/gRNA[dsx+ix+βTub]#1♀	3879	77.58	72.464	3108	80.1237	1063	23.2947	27.404	Cas9♂/+;gRNA[dsx+ix+βTub]#1♀/+	1141	156	86.3278	0		0			92.6623	0	1243	1165	78	93.7249	7.33772	13	16.6667	7	0.502953	0	0	4992	116	2.32372
50 nup50-Cas9/nup50-Cas9♂ X 50 gRNA[dsx+ix+βTub]#1/gRNA[dsx+ix+βTub]#1♀	3991	79.82	74.5563	2983	74.7432	920	34.3279	23.0519	Cas9♂/+;gRNA[dsx+ix+βTub]#1♀/+	983	114	88.4028	0		0			94.4565	0	976	925	51	94.7746	5.54348	11	21.5686	14	1.1888	0	0	4325	63	1.45665
50 nup50-Cas9/nup50-Cas9♂ X 50 gRNA[dsx+ix+βTub]#2/gRNA[dsx+ix+βTub]#2♀	3093	61.86	57.7807	2366	76.4953	966	14.9197	31.2318	Cas9♂/+;gRNA[dsx+ix+βTub]#2♀/+	1052	125	88.1179	0		0			95.9627	0	961	922	39	95.9417	4.03727	9	23.0769	12	1.24541	0	0	5037	97	1.92575
50 nup50-Cas9/nup50-Cas9♂ X 50 gRNA[dsx+ix+βTub]#2/gRNA[dsx+ix+βTub]#2♀	3690	73.8	68.9333	2914	78.9702	940	25.4976	25.4743	Cas9♂/+;gRNA[dsx+ix+βTub]#2♀/+	1019	119	88.3219	0		0			95.7447	0	1152	1112	40	96.5278	4.25532	12	30	24	1.86811	0	0	4025	103	2.55901
50 nup50-Cas9/nup50-Cas9♂ X 50 gRNA[dsx+ix+βTub]#2/gRNA[dsx+ix+βTub]#2♀	2951	59.02	55.128	2515	85.2253	1013	18.8867	34.3273	Cas9♂/+;gRNA[dsx+ix+βTub]#2♀/+	1046	98	90.631	0		0			93.5834	0	994	929	65	93.4608	6.41658	19	29.2308	40	1.96643	0	0	4629	19	0.410456
50 nup50-Cas9/nup50-Cas9 ♂ X 50 gRNA[dsx+ix+βTub]#3/gRNA[dsx+ix+βTub]#3♀	3584	71.68	66.9531	2916	81.3616	1079	16.3237	30.106	Cas9♂/+;gRNA[dsx+ix+βTub]#3♀/+	1168	160	86.3014	0		0			93.4198	0	1272	1201	71	94.4182	6.58017	16	22.5352	33	1.92649	0	0	4469	15	0.335646
50 nup50-Cas9/nup50-Cas9 ♂ X 50 gRNA[dsx+ix+βTub]#3/gRNA[dsx+ix+βTub]#3♀	3268	65.36	61.0499	2693	82.4051	938	24.8422	28.7026	Cas9♂/+;gRNA[dsx+ix+βTub]#3♀/+	1035	144	86.087	0		0			94.9893	0	989	942	47	95.2477	5.01066	9	19.1489	15	1.55676	0	0	4271	0	0
50 nup50-Cas9/nup50-Cas9 ♂ X 50 gRNA[dsx+ix+βTub]#3/gRNA[dsx+ix+βTub]#3♀	3703	74.06	69.1762	2938	79.3411	1058	20.8305	28.5714	Cas9♂/+;gRNA[dsx+ix+βTub]#3♀/+	1117	106	90.5103	0		0			95.5577	0	1209	1162	47	96.1125	4.44234	8	17.0213	17	1.98487	0	0	4075	79	1.93865
Statistical Analysis
F1 progeny	Eggs laid per ♀	Hatching rate	Larval death	Larval death % Stat	egg-to adult survival %	egg-to-adult % Stat	♂ pupa-adult survival	♀ pupa-adult survival	♂ adult %	♂ adult % stat	♀ adult ratio	⚥ pupal-adult death%	⚥ adult ratio %	♀ /⚥ % Stat	⚥ blood taking rate	Eggs laid per ⚥	⚥ Fertility	F1 ♂ Fertility
+/+	85.8024	95.4061	6.75491	8.29673	84.8247	83.2366	94.7628	95.9263	49.23		50.77		0	50.0655				96.4162
+/+	93.7418	96.0343	6.1631	3.19675	85.1534	3.03986	94.1176	94.8928	51.2989		48.7011		0	1.18182				95.5046
+/+	80.7398	96.4368	11.9722		79.7316		94.7016	93.177	49.2745		50.7255		0					94.083
Cas9♂/+	83.5606	89.9844	7.42857		77.8896		93.8486	93.1469	51.2342		48.7658		0					93.6737
Cas9♂/+	86.1013	86.1575	9.89675		71.8377		92.5711	92.5067	48.1728		51.8272		0					89.327
Cas9♂/+	75.2475	90.6653	9.83023		75.2731		92.1488	91.995	51.4842		48.5158		0					94.6997
Cas9♀/+	65.8136	81.6066	11.2696		67.3006		92.3506	93.5185	48.8823		51.1177		0					84.8993
Cas9♀/+	67.6069	83.6695	19.2536		62.3377		90.9861	93.7228	52.3493		47.6507		0					88.1021
Cas9♀/+	59.4807	86.7776	10.4235		71.608		92.5373	91.7258	48.9474		51.0526		0					90.8108
gRNA[dsx+ix+βTub]#1♂/+	92.0979	89.6755	12.599		73.3469		94.2857	92.9078	49.281		50.719		0					91.8428
gRNA[dsx+ix+βTub]#1♂/+	100	89.277	13.5593		71.6794		92.3994	93.3428	48.4754		51.5246		0					90.1769
gRNA[dsx+ix+βTub]#1♂/+	93.9286	84.288	12.3407		69.0732		93.6259	93.337	51.598		48.402		0					90.8646
gRNA[dsx+ix+βTub]#1♀/+	72.2959	81.8346	12.5039		67.8295		95.0186	94.46	48.6857		51.3143		0					85.6466
gRNA[dsx+ix+βTub]#1♀/+	66.9344	86.6592	13.0113		71.5601		94.5413	95.2967	48.6349		51.3651		0					87.4707
gRNA[dsx+ix+βTub]#1♀/+	57.4444	85.3333	11.6616		72.1301		95.7389	95.6379	47.6105		52.3895		0					88.9662
Cas9♀/+;gRNA[dsx+ix+βTub]#1♂/+	62.1707	74.5793	58.9041	61.4947	15.8353	14.5722	92.4354	0	95.0664	94.3722	0	94.5607	4.93359	5.51679	0	0	0	0
Cas9♀/+;gRNA[dsx+ix+βTub]#1♂/+	56.2862	78.2277	61.6886	2.49936	13.2758	1.28009	91.3876	0	95.5	1.30945	0	96.2887	4.5	1.40249	0	0	0	0
Cas9♀/+;gRNA[dsx+ix+βTub]#1♂/+	70.0915	83.5554	63.8915	P<0.0001	14.6055	P<0.0001	89.6127	0	92.8832		0	93.0851	7.11679	P<0.0001	0	0	0	5.54819
Cas9♂/+;gRNA[dsx+ix+βTub]#1♀/+	64.2257	82.7225	24.3319	27.3182	29.523	26.6596	87.4775	0	95.665	94.2613	0	95.7774	4.33498	5.73873	15.9091	4.26997	0	0
Cas9♂/+;gRNA[dsx+ix+βTub]#1♀/+	72.464	80.1237	23.2947	6.09268	27.404	3.29915	86.3278	0	92.6623	1.51087	0	93.7249	7.33772	1.51087	16.6667	0.502953	0	2.32372
Cas9♂/+;gRNA[dsx+ix+βTub]#1♀/+	74.5563	74.7432	34.3279	P<0.0001	23.0519	P<0.0001	88.4028	0	94.4565		0	94.7746	5.54348	P<0.0001	21.5686	1.1888	0	1.45665
Student t test with equal variance

## Sheet: Supp Table 5
Supplementary Table 5. Data on female blood feeding assay
	Small (24.5cm x 24.5cm x 24.5cm) cage		Large (60cm x 60cm x 60cm) cage			Small (24.5cm x 24.5cm x 24.5cm) cage
♀ group	Time to bite (max 6000 secs)	Feeding time (max 1000 secs)	Time to bite (max 6000 secs)	Feeding time (max 1000 secs)			Number of ♀/⚥ that bitten a mouse	Time to bite [mean±SD]	P significance vs WT ♀	Feeding time [mean±SD]	P significance
WT ♀	26	101	17	113		WT ♀	30	15.93 ± 5.85		134.03 ± 22.55
WT ♀	14	129	14	162		gRNA[dsx,ix,βTub]#1 ♀	30	16.13 ± 7.38	0.9982	136.80 ± 25.37	0.6431
WT ♀	16	176	9	137		Cas9/Cas9 ♀	30	16.30 ± 7.78	0.9967	144.03 ± 20.76	0.0964
WT ♀	24	104	21	145		pgSIT[♀Cas9] ⚥	2	3339.00 ± 1678.67	< 0.0001	N/A
WT ♀	19	134	12	129		pgSIT[♂Cas9] ⚥	5	3110.20 ± 1384.01	< 0.0001	689.00 ± 26.15	< 0.0001
WT ♀	20	121	14	146
WT ♀	11	124	32	153		Large (60cm x 60cm x 60cm) cage
WT ♀	14	169	16	133			Number of ♀/⚥ that bitten a mouse	Time to bite [mean±SD]	P significance vs WT ♀	Feeding time [mean±SD]	P significance
WT ♀	7	175	45	182		WT ♀	30	22.00 ± 7.69		133.93 ± 20.40
WT ♀	9	167	22	139		gRNA[dsx,ix,βTub]#1 ♀	30	24.17 ± 8.75	0.3229	135.10 ± 23.00	0.8314
WT ♀	17	110	25	97		Cas9/Cas9 ♀	30	23.40 ± 8.83	0.5223	140.37 ± 19.96	0.2423
WT ♀	18	116	30	116		pgSIT[♀Cas9] ⚥	0	N/A		N/A
WT ♀	18	120	28	111		pgSIT[♂Cas9] ⚥	0	N/A		N/A
WT ♀	20	107	22	144
WT ♀	11	175	25	134
WT ♀	11	160	14	153
WT ♀	10	143	20	150
WT ♀	11	123	24	150
WT ♀	20	129	17	99
WT ♀	27	132	19	118
WT ♀	10	127	21	120
WT ♀	20	123	15	143
WT ♀	13	120	37	100
WT ♀	7	153	26	139
WT ♀	19	122	23	131
WT ♀	25	101	15	146
WT ♀	6	130	24	153
WT ♀	19	138	19	147
WT ♀	15	148	26	103
WT ♀	21	144	28	125
gRNA[dsx+ix+βTub]#1/gRNA[dsx+ix+βTub]#1 ♀	15	141	37	111
gRNA[dsx+ix+βTub]#1/gRNA[dsx+ix+βTub]#1 ♀	15	114	24	133
gRNA[dsx+ix+βTub]#1/gRNA[dsx+ix+βTub]#1 ♀	30	164	30	104
gRNA[dsx+ix+βTub]#1/gRNA[dsx+ix+βTub]#1 ♀	30	107	33	104
gRNA[dsx+ix+βTub]#1/gRNA[dsx+ix+βTub]#1 ♀	17	170	17	170
gRNA[dsx+ix+βTub]#1/gRNA[dsx+ix+βTub]#1 ♀	7	103	14	116
gRNA[dsx+ix+βTub]#1/gRNA[dsx+ix+βTub]#1 ♀	12	108	16	134
gRNA[dsx+ix+βTub]#1/gRNA[dsx+ix+βTub]#1 ♀	22	144	29	164
gRNA[dsx+ix+βTub]#1/gRNA[dsx+ix+βTub]#1 ♀	11	176	22	176
gRNA[dsx+ix+βTub]#1/gRNA[dsx+ix+βTub]#1 ♀	8	162	22	130
gRNA[dsx+ix+βTub]#1/gRNA[dsx+ix+βTub]#1 ♀	18	106	25	151
gRNA[dsx+ix+βTub]#1/gRNA[dsx+ix+βTub]#1 ♀	29	148	23	141
gRNA[dsx+ix+βTub]#1/gRNA[dsx+ix+βTub]#1 ♀	11	115	12	107
gRNA[dsx+ix+βTub]#1/gRNA[dsx+ix+βTub]#1 ♀	16	139	33	123
gRNA[dsx+ix+βTub]#1/gRNA[dsx+ix+βTub]#1 ♀	15	155	15	156
gRNA[dsx+ix+βTub]#1/gRNA[dsx+ix+βTub]#1 ♀	9	170	21	169
gRNA[dsx+ix+βTub]#1/gRNA[dsx+ix+βTub]#1 ♀	9	141	21	151
gRNA[dsx+ix+βTub]#1/gRNA[dsx+ix+βTub]#1 ♀	27	101	17	118
gRNA[dsx+ix+βTub]#1/gRNA[dsx+ix+βTub]#1 ♀	21	144	28	120
gRNA[dsx+ix+βTub]#1/gRNA[dsx+ix+βTub]#1 ♀	11	130	24	141
gRNA[dsx+ix+βTub]#1/gRNA[dsx+ix+βTub]#1 ♀	30	105	22	123
gRNA[dsx+ix+βTub]#1/gRNA[dsx+ix+βTub]#1 ♀	10	104	12	114
gRNA[dsx+ix+βTub]#1/gRNA[dsx+ix+βTub]#1 ♀	7	139	35	125
gRNA[dsx+ix+βTub]#1/gRNA[dsx+ix+βTub]#1 ♀	12	164	39	152
gRNA[dsx+ix+βTub]#1/gRNA[dsx+ix+βTub]#1 ♀	19	168	34	119
gRNA[dsx+ix+βTub]#1/gRNA[dsx+ix+βTub]#1 ♀	25	119	10	104
gRNA[dsx+ix+βTub]#1/gRNA[dsx+ix+βTub]#1 ♀	12	104	33	115
gRNA[dsx+ix+βTub]#1/gRNA[dsx+ix+βTub]#1 ♀	14	144	35	176
gRNA[dsx+ix+βTub]#1/gRNA[dsx+ix+βTub]#1 ♀	9	176	33	162
gRNA[dsx+ix+βTub]#1/gRNA[dsx+ix+βTub]#1 ♀	13	143	9	144
Cas9/Cas9 ♀	16	101	28	160
Cas9/Cas9 ♀	20	176	38	172
Cas9/Cas9 ♀	11	167	20	134
Cas9/Cas9 ♀	30	112	39	129
Cas9/Cas9 ♀	12	139	18	141
Cas9/Cas9 ♀	28	161	13	176
Cas9/Cas9 ♀	27	144	24	159
Cas9/Cas9 ♀	16	151	20	121
Cas9/Cas9 ♀	25	127	39	107
Cas9/Cas9 ♀	18	140	11	163
Cas9/Cas9 ♀	22	151	10	130
Cas9/Cas9 ♀	12	132	20	103
Cas9/Cas9 ♀	19	132	11	161
Cas9/Cas9 ♀	30	165	26	126
Cas9/Cas9 ♀	7	154	30	153
Cas9/Cas9 ♀	25	135	36	142
Cas9/Cas9 ♀	9	162	26	156
Cas9/Cas9 ♀	27	118	11	171
Cas9/Cas9 ♀	11	125	15	112
Cas9/Cas9 ♀	8	167	15	144
Cas9/Cas9 ♀	10	155	15	115
Cas9/Cas9 ♀	7	116	36	140
Cas9/Cas9 ♀	8	150	26	154
Cas9/Cas9 ♀	14	119	27	111
Cas9/Cas9 ♀	8	163	29	145
Cas9/Cas9 ♀	10	130	28	141
Cas9/Cas9 ♀	8	163	21	128
Cas9/Cas9 ♀	9	175	17	137
Cas9/Cas9 ♀	25	122	27	130
Cas9/Cas9 ♀	17	169	26	150
pgSIT[♀Cas9] ⚥
pgSIT[♀Cas9] ⚥
pgSIT[♀Cas9] ⚥
pgSIT[♀Cas9] ⚥
pgSIT[♀Cas9] ⚥
pgSIT[♀Cas9] ⚥
pgSIT[♀Cas9] ⚥
pgSIT[♀Cas9] ⚥	2152
pgSIT[♀Cas9] ⚥
pgSIT[♀Cas9] ⚥
pgSIT[♀Cas9] ⚥
pgSIT[♀Cas9] ⚥
pgSIT[♀Cas9] ⚥	4526
pgSIT[♀Cas9] ⚥
pgSIT[♀Cas9] ⚥
pgSIT[♀Cas9] ⚥
pgSIT[♀Cas9] ⚥
pgSIT[♀Cas9] ⚥
pgSIT[♀Cas9] ⚥
pgSIT[♀Cas9] ⚥
pgSIT[♀Cas9] ⚥
pgSIT[♀Cas9] ⚥
pgSIT[♀Cas9] ⚥
pgSIT[♀Cas9] ⚥
pgSIT[♀Cas9] ⚥
pgSIT[♀Cas9] ⚥
pgSIT[♀Cas9] ⚥
pgSIT[♀Cas9] ⚥
pgSIT[♀Cas9] ⚥
pgSIT[♀Cas9] ⚥
pgSIT[♂Cas9] ⚥
pgSIT[♂Cas9] ⚥
pgSIT[♂Cas9] ⚥
pgSIT[♂Cas9] ⚥	2761	677
pgSIT[♂Cas9] ⚥
pgSIT[♂Cas9] ⚥
pgSIT[♂Cas9] ⚥
pgSIT[♂Cas9] ⚥
pgSIT[♂Cas9] ⚥	2215
pgSIT[♂Cas9] ⚥
pgSIT[♂Cas9] ⚥
pgSIT[♂Cas9] ⚥
pgSIT[♂Cas9] ⚥
pgSIT[♂Cas9] ⚥
pgSIT[♂Cas9] ⚥	4029
pgSIT[♂Cas9] ⚥
pgSIT[♂Cas9] ⚥
pgSIT[♂Cas9] ⚥
pgSIT[♂Cas9] ⚥
pgSIT[♂Cas9] ⚥
pgSIT[♂Cas9] ⚥
pgSIT[♂Cas9] ⚥
pgSIT[♂Cas9] ⚥	4982	719
pgSIT[♂Cas9] ⚥
pgSIT[♂Cas9] ⚥
pgSIT[♂Cas9] ⚥	1564	671
pgSIT[♂Cas9] ⚥
pgSIT[♂Cas9] ⚥
pgSIT[♂Cas9] ⚥
pgSIT[♂Cas9] ⚥
	max 6000s

## Sheet: Supp Table 6
Supplementary Table 6. Data on flight activity
Time	code	WT♀ #1	WT♀#2	WT♀ #3	WT♀ #4	WT♀ #4	WT♀ #6	WT♀ #7	WT♀ #8	WT♀ #9	WT♀ #10	WT♀ #11	WT♀ #12	WT♀ #13	WT♀ #14	WT♀ #15	WT♀ #16	WT♀ #17	WT♀ #18	WT♀ #19	WT♀ #20	WT♀ #21	WT♀ #22	WT♀ #23	WT♀ #24
07:00:00	ZT0	23	1	12	13	17	3	45	1	13	15	16	1	7	18	45	31	13	19	31	16	13	53	13	13
08:00:00	ZT1	1	1	2	19	8	4	32	3	33	32	22	4	13	12	13	19	32	13	0	13	34	1	23	14
09:00:00	ZT2	1	2	3	37	29	28	1	9	19	32	33	7	21	11	54	22	33	34	1	34	43	4	43	8
10:00:00	ZT3	0	3	4	3	1	21	0	12	4	1	14	11	1	7	0	13	4	18	14	53	12	5	1	32
11:00:00	ZT4	0	41	0	0	0	0	0	2	3	2	5	23	3	13	32	1	34	17	3	2	12	19	1	1
12:00:00	ZT5	0	0	0	0	0	0	0	1	0	3	0	22	18	0	0	7	34	1	1	2	1	0	0	8
13:00:00	ZT6	0	0	0	0	0	0	0	0	0	3	0	0	29	0	0	3	13	0	0	12	0	0	0	0
14:00:00	ZT7	0	0	0	0	1	0	0	0	3	0	0	0	0	0	1	0	1	0	1	1	0	0	0	0
15:00:00	ZT8	0	0	0	0	1	0	1	0	2	0	1	0	1	1	34	0	0	0	0	1	0	0	0	0
16:00:00	ZT9	0	0	1	1	0	0	67	21	1	9	3	0	0	12	2	0	0	0	1	0	0	0	0	0
17:00:00	ZT10	13	1	1	3	0	1	34	13	17	1	3	1	0	23	0	0	0	21	0	0	0	0	0	0
18:00:00	ZT11	17	3	1	16	13	3	22	19	19	7	23	34	0	34	1	1	0	12	42	4	0	32	0	0
19:00:00	ZT12	0	16	19	12	12	9	11	34	43	2	35	41	1	22	0	1	0	16	12	3	0	23	23	0
20:00:00	ZT13	0	19	21	0	7	19	19	32	32	19	21	14	0	16	53	41	0	32	34	43	0	21	32	43
21:00:00	ZT14	3	22	13	3	11	34	9	0	6	1	0	0	0	1	0	23	0	32	12	21	0	0	0	12
22:00:00	ZT15	2	3	0	1	0	32	0	0	1	1	0	0	0	0	0	44	0	0	12	12	0	0	0	11
23:00:00	ZT16	5	1	0	0	0	0	0	0	0	0	0	0	0	0	0	1	0	0	0	2	0	0	0	7
1900-01-01	ZT17	1	0	0	0	0	0	0	0	0	0	0	1	0	0	0	0	0	1	0	0	0	0	0	0
1900-01-01 01:00:00	ZT18	1	0	0	0	0	0	1	0	0	0	1	3	0	0	0	0	0	1	0	0	0	0	0	0
1900-01-01 02:00:00	ZT19	9	0	1	0	0	1	3	0	0	0	3	3	4	34	0	9	13	7	1	9	23	23	0	9
1900-01-01 03:00:00	ZT20	9	0	8	0	0	3	3	11	0	19	0	19	0	64	23	1	23	32	3	12	0	13	23	0
1900-01-01 04:00:00	ZT21	13	0	6	1	11	28	0	32	0	26	0	35	0	13	43	0	21	15	43	12	23	0	12	11
1900-01-01 05:00:00	ZT22	1	1	9	23	16	21	13	1	3	12	1	53	0	0	23	0	1	13	12	43	0	0	2	45
1900-01-01 06:00:00	ZT23	22	9	23	19	26	9	17	11	49	11	29	12	37	23	0	14	14	7	1	17	12	0	19	12
	sum =	121	123	124	151	153	216	278	202	248	196	210	284	135	304	324	231	236	291	224	312	173	194	192	226
average=	214.5
SD =	62.1744
Time	code	pgSIT♀#1	pgSIT♀#2	pgSIT♀#3	pgSIT♀#4	pgSIT♀#5	pgSIT♀#6	pgSIT♀#7	pgSIT♀#8	pgSIT♀#9	pgSIT♀#10	pgSIT♀#11	pgSIT♀#12	pgSIT♀#13	pgSIT♀#14	pgSIT♀#15	pgSIT♀#16	pgSIT♀#17	pgSIT♀#18	pgSIT♀#19	pgSIT♀#20	pgSIT♀#21	pgSIT♀#22	pgSIT♀#23	pgSIT♀#24
07:00:00	ZT0	0	0	0	0	0	0	0	0	0	0	0	0	0	0	0	0	0	0	0	0	0	0	0	0
08:00:00	ZT1	0	0	0	0	0	0	0	0	0	0	0	0	0	0	0	0	0	0	0	0	0	0	0	0
09:00:00	ZT2	0	0	0	0	0	0	0	0	0	0	0	0	0	0	0	0	0	0	0	0	0	0	0	0
10:00:00	ZT3	0	0	0	0	0	0	0	0	0	0	0	0	0	0	0	0	0	0	0	0	0	0	0	0
11:00:00	ZT4	0	0	0	0	0	0	0	0	0	0	0	0	0	0	0	0	0	0	0	0	0	0	0	0
12:00:00	ZT5	0	0	0	0	0	0	0	0	0	0	0	0	0	0	0	0	0	0	0	0	0	0	0	0
13:00:00	ZT6	0	0	0	0	0	0	0	0	0	0	0	0	0	0	0	0	0	0	0	0	0	0	0	0
14:00:00	ZT7	0	0	0	0	0	0	0	0	0	0	0	0	0	0	0	0	0	0	0	0	0	0	0	0
15:00:00	ZT8	0	0	0	0	0	0	0	0	0	0	0	0	0	0	0	0	0	0	0	0	0	0	0	0
16:00:00	ZT9	0	0	0	0	0	0	0	0	0	0	0	0	0	0	0	0	0	0	0	0	0	0	0	0
17:00:00	ZT10	0	0	0	0	0	0	0	0	0	0	0	0	0	0	0	0	0	0	0	0	0	0	0	0
18:00:00	ZT11	0	0	0	0	0	0	0	0	0	0	0	0	0	0	0	0	0	0	0	0	0	0	0	0
19:00:00	ZT12	0	0	0	0	0	0	0	0	0	0	0	0	0	0	0	0	0	0	0	0	0	0	0	0
20:00:00	ZT13	0	0	0	0	0	0	0	0	0	0	0	0	0	0	0	0	0	0	0	0	0	0	0	0
21:00:00	ZT14	0	0	0	0	0	0	0	0	0	0	0	0	0	0	0	0	0	0	0	0	0	0	0	0
22:00:00	ZT15	0	0	0	0	0	0	0	0	0	0	0	0	0	0	0	0	0	0	0	0	0	0	0	0
23:00:00	ZT16	0	0	0	0	0	0	0	0	0	0	0	0	0	0	0	0	0	0	0	0	0	0	0	0
1900-01-01	ZT17	0	0	0	0	0	0	0	0	0	0	0	0	0	0	0	0	0	0	0	0	0	0	0	0
1900-01-01 01:00:00	ZT18	0	0	0	0	0	0	0	0	0	0	0	0	0	0	0	0	0	0	0	0	0	0	0	0
1900-01-01 02:00:00	ZT19	0	0	0	0	0	0	0	0	0	0	0	0	0	0	0	0	0	0	0	0	0	0	0	0
1900-01-01 03:00:00	ZT20	0	0	0	0	0	0	0	0	0	0	0	0	0	0	0	0	0	0	0	0	0	0	0	0
1900-01-01 04:00:00	ZT21	0	0	0	0	0	0	0	0	0	0	0	0	0	0	0	0	0	0	0	0	0	0	0	0
1900-01-01 05:00:00	ZT22	0	0	0	0	0	0	0	0	0	0	0	0	0	0	0	0	0	0	0	0	0	0	0	0
1900-01-01 06:00:00	ZT23	0	0	0	0	0	0	0	0	0	0	0	0	0	0	0	0	0	0	0	0	0	0	0	0
	sum =	0	0	0	0	0	0	0	0	0	0	0	0	0	0	0	0	0	0	0	0	0	0	0	0
average=	0
SD =	0
Time	code	WT♂ #1	WT♂ #2	WT♂ #3	WT♂ #4	WT♂ #5	WT♂ #6	WT♂ #7	WT♂ #8	WT♂ #9	WT♂ #10	WT♂ #11	WT♂ #12	WT♂ #13	WT♂ #14	WT♂ #15	WT♂ #6	WT♂ #17	WT♂ #18	WT♂ #19	WT♂ #20	WT♂ #21	WT♂ #22	WT♂ #23	WT♂ #24
07:00:00	ZT0	54	13	43	32	7	12	13	12	11	11	43	43	23	12	32	23	5	32	23	23	32	12	32	16
08:00:00	ZT1	32	22	32	34	11	32	2	23	32	33	42	22	43	32	32	23	3	15	43	32	13	32	11	23
09:00:00	ZT2	12	31	13	22	33	2	22	23	1	21	12	11	32	12	11	12	56	23	22	13	56	21	34	34
10:00:00	ZT3	0	1	0	11	12	2	33	43	1	19	32	0	0	1	1	34	32	13	1	1	3	23	1	0
11:00:00	ZT4	0	0	0	9	0	0	0	0	9	45	0	7	3	33	1	56	16	1	3	1	2	1	15	1
12:00:00	ZT5	2	0	0	7	1	0	0	0	0	0	0	13	1	3	0	22	23	23	5	3	1	1	5	0
13:00:00	ZT6	1	11	0	2	1	0	1	0	0	0	2	0	2	2	0	0	1	0	3	13	0	3	1	0
14:00:00	ZT7	3	0	0	13	1	0	0	1	0	0	0	0	3	1	0	3	0	3	6	0	0	0	5	3
15:00:00	ZT8	4	0	12	0	19	0	1	3	0	0	0	1	0	3	1	7	0	0	0	0	0	0	3	3
16:00:00	ZT9	7	0	7	0	23	1	23	12	3	3	0	3	0	0	2	32	0	23	32	32	1	0	0	0
17:00:00	ZT10	9	0	9	19	12	3	43	9	2	11	0	0	0	0	3	1	0	33	1	3	3	1	0	0
18:00:00	ZT11	1	13	11	4	32	0	21	23	19	34	2	0	21	13	0	32	0	0	1	12	23	0	0	2
19:00:00	ZT12	13	34	13	1	32	22	13	12	33	12	1	0	51	2	22	22	0	23	21	12	1	0	0	5
20:00:00	ZT13	9	43	23	2	21	32	3	1	45	0	2	2	32	1	3	1	9	1	0	0	0	0	0	19
21:00:00	ZT14	1	32	43	1	18	17	2	0	1	3	1	45	13	1	0	0	12	4	0	2	23	0	3	14
22:00:00	ZT15	6	14	13	3	6	9	2	0	0	4	0	23	23	0	1	21	23	3	0	2	2	0	13	5
23:00:00	ZT16	43	1	22	3	1	0	0	0	0	5	0	0	3	15	9	1	1	0	0	2	3	0	0	2
1900-01-01	ZT17	0	0	34	0	5	1	0	3	0	7	0	0	1	8	11	0	0	0	2	18	5	0	0	4
1900-01-01 01:00:00	ZT18	0	0	9	9	1	0	0	4	2	0	0	0	0	0	0	9	0	0	2	0	4	3	0	1
1900-01-01 02:00:00	ZT19	0	1	0	13	34	6	0	3	3	0	32	0	0	3	0	15	0	31	6	33	0	2	0	0
1900-01-01 03:00:00	ZT20	14	8	0	1	21	12	32	2	13	0	21	3	32	22	22	22	2	23	32	22	1	1	34	0
1900-01-01 04:00:00	ZT21	18	23	2	1	19	12	11	19	42	0	18	23	12	7	13	31	34	13	12	18	2	16	43	33
1900-01-01 05:00:00	ZT22	12	19	1	30	21	8	12	34	19	19	34	43	12	17	45	2	21	2	16	12	34	23	41	25
1900-01-01 06:00:00	ZT23	33	34	3	44	31	7	0	54	28	45	47	14	32	22	13	5	43	35	52	7	21	34	22	56
	sum =	274	300	290	261	362	178	234	281	264	272	289	253	339	210	222	374	281	301	283	261	230	173	263	246
average=	268.375
SD =	48.8189
Time	code	pgSIT♂ #1	pgSIT♂ #2	pgSIT♂ #3	pgSIT♂ #4	pgSIT♂ #5	pgSIT♂ #6	pgSIT♂ #7	pgSIT♂ #8	pgSIT♂ #9	pgSIT♂ #10	pgSIT♂ #11	pgSIT♂ #12	pgSIT♂ #13	pgSIT♂ #14	pgSIT♂ #15	pgSIT♂ #16	pgSIT♂ #17	pgSIT♂ #18	pgSIT♂ #19	pgSIT♂ #20	pgSIT♂ #21	pgSIT♂ #22	pgSIT♂ #23	pgSIT♂ #24
07:00:00	ZT0	16	1	12	23	7	33	12	22	45	27	23	3	32	19	9	22	7	23	22	32	6	16	45	24
08:00:00	ZT1	23	1	3	3	13	21	13	12	32	23	21	5	14	21	13	34	6	13	3	21	34	3	32	3
09:00:00	ZT2	1	6	0	5	23	15	16	3	21	12	15	67	23	2	43	53	3	23	0	15	22	4	21	13
10:00:00	ZT3	0	0	7	6	3	5	3	8	8	3	31	7	32	4	22	1	2	4	9	13	13	23	3	3
11:00:00	ZT4	0	0	0	3	3	3	3	0	2	0	0	0	21	14	1	34	0	3	3	3	13	32	13	9
12:00:00	ZT5	0	0	0	0	0	8	13	9	0	0	0	3	0	1	0	0	0	1	0	5	3	0	5	19
13:00:00	ZT6	2	0	5	0	0	0	1	0	0	3	1	0	0	0	0	2	0	0	0	0	0	0	0	0
14:00:00	ZT7	0	0	0	0	0	0	0	3	0	0	0	0	1	0	0	0	0	0	0	0	0	0	3	0
15:00:00	ZT8	0	0	7	0	0	0	1	0	0	0	0	4	2	2	4	3	0	3	0	3	1	3	0	7
16:00:00	ZT9	0	7	6	9	1	16	1	0	1	4	3	3	3	3	3	2	3	0	1	1	3	3	1	0
17:00:00	ZT10	13	0	0	3	3	5	2	2	3	3	0	2	3	5	0	3	5	1	3	2	3	1	0	3
18:00:00	ZT11	3	7	6	1	9	3	3	23	5	1	4	4	5	4	2	0	4	9	0	5	0	2	1	0
19:00:00	ZT12	21	9	0	3	15	1	0	0	2	5	3	5	0	1	0	4	1	0	2	0	0	0	0	3
20:00:00	ZT13	0	13	0	2	0	0	0	0	0	0	23	0	0	0	2	0	3	0	0	0	0	0	0	0
21:00:00	ZT14	4	0	3	0	0	0	0	0	0	3	0	0	0	0	0	0	3	0	0	1	0	13	7	8
22:00:00	ZT15	0	0	0	0	0	0	0	0	0	0	0	0	0	0	1	5	0	0	4	0	0	0	4	0
23:00:00	ZT16	0	0	0	0	0	0	0	0	0	0	0	0	0	0	0	0	0	3	0	1	0	4	0	0
1900-01-01	ZT17	3	0	0	0	0	0	0	0	0	4	0	0	0	0	1	0	0	0	0	0	0	0	6	0
1900-01-01 01:00:00	ZT18	0	0	0	0	0	0	0	0	0	0	0	0	0	1	1	6	0	0	5	0	0	5	0	3
1900-01-01 02:00:00	ZT19	0	0	0	0	0	0	3	0	0	0	12	0	0	0	0	13	0	0	14	1	3	9	3	2
1900-01-01 03:00:00	ZT20	0	23	32	0	21	13	8	11	0	0	3	3	2	2	3	53	2	3	30	3	34	23	2	0
1900-01-01 04:00:00	ZT21	32	2	12	0	23	2	15	34	22	2	23	2	32	0	4	34	32	2	21	5	5	8	32	0
1900-01-01 05:00:00	ZT22	3	1	1	11	7	3	1	2	11	9	4	11	23	8	1	1	34	26	9	23	8	7	8	3
1900-01-01 06:00:00	ZT23	22	1	3	32	5	23	14	41	32	3	45	23	2	7	21	6	9	19	13	10	33	11	30	29
	sum =	143	71	97	101	133	151	109	170	184	102	211	142	195	94	131	276	114	133	139	144	181	167	216	129
average=	147.208
SD =	46.6793
group	Same size	Flight actity	P significance	P significance
WT ♀	24	214.50 ± 62.17
pgSIT ♀	24	0 ± 0	P < 0.0001, vs WT ♀
WT ♂	24	268.38 ± 48.82
pgSIT ♂	24	147.21 ± 46.68	P < 0.0001, vs WT ♂	P < 0.0001, vs WT ♀

## Sheet: Supp Table 7
Supplementary Table 7. Fitness parameters and longevity.
Test group	♀/⚥ took bloodmeal (Y/N)	laid egg #	laid eggs %	Hatched egg #	Egg Hatching %	♂ larva-to-pupa dev. time (days)	♂ pupa-to-adult dev. time (days)	♂ larva-to-adult (days)	♀ larva-to-pupa dev. time (days)	♀ pupa-to-adult dev. time (days)	♀ larva-to-adult (days)		# ♀/⚥ /♂ individual mosquito	Adult ♀/⚥ (escaped from pupa shell) longevity with ♂s (days)	Adult ♀/⚥ (escaped from pupa shell) longevity alone (days)	Adult ♂ longevity with ♀s (days)	Adult ♂ longevity alone (days)
WT	Y	96	70.073	93	96.875	5	2	7	6	2	8		1	12	22	9	35
WT	Y	112	81.7518	110	98.2143	5	2	7	6	2	8		2	58	53	11	26
WT	Y	83	60.5839	79	95.1807	5.5	2	7.5	6.5	2	8.5		3	25	9	17	18
WT	Y	62	45.2555	60	96.7742	5.5	2	7.5	6.5	2	8.5		4	45	65	7	23
WT	Y	90	65.6934	89	98.8889	5.5	2	7.5	6.5	2	8.5		5	37	53	16	8
WT	Y	125	91.2409	121	96.8	5.5	2	7.5	6.5	2	8.5		6	13	58	9	33
WT	Y	103	75.1825	103	100	5.5	2	7.5	6.5	2	8.5		7	43	33	8	3
WT	Y	84	61.3139	82	97.619	6	2	8	6.5	2	8.5		8	33	36	8	12
WT	Y	79	57.6642	73	92.4051	6	2	8	6.5	2	8.5		9	39	73	6	25
WT	Y	112	81.7518	111	99.1071	6	2	8	7	2	9		10	59	45	6	31
WT	Y	91	66.4234	87	95.6044	6	2	8	7	2	9		11	17	24	4	25
WT	Y	68	49.635	65	95.5882	6	2	8	7	2	9		12	3	40	15	30
WT	Y	125	91.2409	121	96.8	6	2	8	7	2	9		13	56	27	14	22
WT	Y	133	97.0803	125	93.985	6	2	8	7	2	9		14	67	58	18	25
WT	Y	107	78.1022	99	92.5234	6.5	2	8.5	7	2	9		15	55	57	8	17
WT	Y	82	59.854	82	100	6.5	2	8.5	7.5	2	9.5		16	26	37	9	19
WT	Y	95	69.3431	91	95.7895	6.5	2	8.5	7.5	2	9.5		17	47	28	18	12
WT	Y	99	72.2628	99	100	6.5	2	8.5	7.5	2	9.5		18	52	6	10	9
WT	Y	119	86.8613	114	95.7983	7	2	9	7.5	2	9.5		19	60	59	18	13
WT	Y	127	92.7007	122	96.063	7	2	9	7.5	2	9.5		20	7	29	7	29
WT	Y	105	76.6423	103	98.0952	5.5	2	7.5	6	2	8		1	44	30	10	21
WT	Y	94	68.6131	92	97.8723	5.5	2	7.5	6	2	8		2	46	16	8	8
WT	Y	117	85.4015	111	94.8718	5.5	2	7.5	6.5	2	8.5		3	45	58	11	15
WT	Y	105	76.6423	102	97.1429	5.5	2	7.5	6.5	2	8.5		4	60	44	12	29
WT	Y	82	59.854	76	92.6829	5.5	2	7.5	6.5	2	8.5		5	22	60	12	11
WT	Y	98	71.5328	95	96.9388	6	2	8	6.5	2	8.5		6	33	65	11	24
WT	Y	71	51.8248	69	97.1831	6	2	8	6.5	2	8.5		7	57	63	15	24
WT	Y	108	78.8321	108	100	6	2	8	6.5	2	8.5		8	2	7	18	29
WT	Y	115	83.9416	112	97.3913	6	2	8	7	2	9		9	60	37	14	28
WT	Y	103	75.1825	99	96.1165	6	2	8	7	2	9		10	59	55	13	5
WT	Y	137	100	131	95.6204	6	2	8	7	2	9		11	5	37	19	24
WT	Y	92	67.1533	90	97.8261	6	2	8	7	2	9		12	66	73	13	12
WT	Y	104	75.9124	101	97.1154	6	2	8	7	2	9		13	52	22	12	22
WT	Y	82	59.854	81	98.7805	6	2	8	7	2	9		14	51	7	17	33
WT	Y	90	65.6934	89	98.8889	6	2	8	7.5	2	9.5		15	17	25	14	30
WT	Y	97	70.8029	94	96.9072	6.5	2	8.5	7.5	2	9.5		16	13	19	12	26
WT	Y	88	64.2336	87	98.8636	6.5	2	8.5	7.5	2	9.5		17	9	31	3	14
WT	Y	81	59.1241	78	96.2963	6.5	2	8.5	7.5	2	9.5		18	34	37	14	28
WT	Y	106	77.3723	100	94.3396	6.5	2	8.5	7.5	2	9.5		19	9	59	9	26
WT	Y	86	62.7737	83	96.5116	7	2	9	7.5	2	9.5		20	42	58	10	2
WT	Y	124	90.5109	119	95.9677	5.5	2	7.5	6	2	8		1	6	54	9	26
WT	Y	85	62.0438	85	100	5.5	2	7.5	6	2	8		2	40	27	15	29
WT	Y	97	70.8029	97	100	5.5	2	7.5	6.5	2	8.5		3	61	67	11	28
WT	Y	107	78.1022	104	97.1963	5.5	2	7.5	6.5	2	8.5		4	24	65	14	30
WT	Y	96	70.073	92	95.8333	5.5	2	7.5	6.5	2	8.5		5	12	14	5	8
WT	Y	82	59.854	80	97.561	5.5	2	7.5	6.5	2	8.5		6	10	38	2	13
WT	Y	109	79.562	106	97.2477	6	2	8	6.5	2	8.5		7	70	46	4	7
WT	Y	115	83.9416	111	96.5217	6	2	8	7	2	9		8	60	18	13	26
WT	Y	119	86.8613	117	98.3193	6	2	8	7	2	9		9	27	3	15	29
WT	Y	91	66.4234	90	98.9011	6	2	8	7	2	9		10	69	63	15	9
WT	Y	76	55.4745	73	96.0526	6	2	8	7	2	9		11	54	23	14	27
WT	Y	96	70.073	96	100	6	2	8	7	2	9		12	37	30	16	29
WT	Y	98	71.5328	94	95.9184	6	2	8	7	2	9		13	48	33	14	9
WT	Y	104	75.9124	101	97.1154	6	2	8	7	2	9		14	33	10	16	4
WT	Y	116	84.6715	112	96.5517	6	2	8	7	2	9		15	5	32	13	17
WT	Y	83	60.5839	82	98.7952	6.5	2	8.5	7.5	2	9.5		16	52	65	14	23
WT	Y	87	63.5036	87	100	6.5	2	8.5	7.5	2	9.5		17	68	36	16	25
WT	Y	99	72.2628	94	94.9495	6.5	2	8.5	7.5	2	9.5		18	7	43	9	1
WT	Y	101	73.7226	95	94.0594	6.5	2	8.5	7.5	2	9.5		19	27	27	15	29
WT	Y	110	80.292	103	93.6364	6.5	2	8.5	7.5	2	9.5		20	16	58	13	31
Cas9/Cas9	Y	81	59.1241	74	91.358	5.5	2	7.5	6.5	2	8.5		1	51	28	6	7
Cas9/Cas9	Y	63	45.9854	51	80.9524	5.5	2	7.5	6.5	2	8.5		2	9	7	5	17
Cas9/Cas9	Y	95	69.3431	82	86.3158	5.5	2	7.5	7	2	9		3	22	50	18	35
Cas9/Cas9	Y	107	78.1022	91	85.0467	6	2	8	7	2	9		4	32	13	18	32
Cas9/Cas9	Y	84	61.3139	74	88.0952	6	2	8	7	2	9		5	62	48	4	18
Cas9/Cas9	Y	90	65.6934	81	90	6	2	8	7	2	9		6	27	19	3	19
Cas9/Cas9	Y	101	73.7226	88	87.1287	6	2	8	7.5	2	9.5		7	43	33	18	18
Cas9/Cas9	Y	125	91.2409	113	90.4	6.5	2	8.5	7.5	2	9.5		8	32	50	16	18
Cas9/Cas9	Y	68	49.635	59	86.7647	6.5	2	8.5	7.5	2	9.5		9	51	65	10	19
Cas9/Cas9	Y	79	57.6642	72	91.1392	6.5	2	8.5	7.5	2	9.5		10	20	11	5	17
Cas9/Cas9	Y	77	56.2044	64	83.1169	6.5	2	8.5	7.5	2	9.5		11	3	41	5	5
Cas9/Cas9	Y	87	63.5036	62	71.2644	6.5	2	8.5	7.5	2	9.5		12	12	47	7	20
Cas9/Cas9	Y	92	67.1533	84	91.3043	6.5	2	8.5	7.5	2	9.5		13	41	61	19	35
Cas9/Cas9	Y	89	64.9635	75	84.2697	6.5	2	8.5	7.5	2	9.5		14	58	50	12	13
Cas9/Cas9	Y	73	53.2847	61	83.5616	6.5	2	8.5	7.5	2	9.5		15	24	47	4	14
Cas9/Cas9	Y	104	75.9124	89	85.5769	6.5	2	8.5	7.5	2	9.5		16	42	26	9	14
Cas9/Cas9	Y	96	70.073	85	88.5417	6.5	2	8.5	7.5	2	9.5		17	17	56	14	29
Cas9/Cas9	Y	117	85.4015	106	90.5983	7	2	9	7.5	2	9.5		18	38	43	12	19
Cas9/Cas9	Y	93	67.8832	75	80.6452	7.5	2	9.5	8.5	2	10.5		19	46	37	18	9
Cas9/Cas9	Y	82	59.854	67	81.7073	7.5	2	9.5	8.5	2	10.5		20	26	34	19	13
Cas9/Cas9	Y	115	83.9416	98	85.2174	5.5	2	7.5	6.5	2	8.5		1	8	15	10	20
Cas9/Cas9	Y	92	67.1533	73	79.3478	5.5	2	7.5	6.5	2	8.5		2	55	25	12	20
Cas9/Cas9	Y	105	76.6423	85	80.9524	5.5	2	7.5	7	2	9		3	42	29	7	23
Cas9/Cas9	Y	67	48.9051	51	76.1194	6	2	8	7	2	9		4	22	8	10	20
Cas9/Cas9	Y	82	59.854	62	75.6098	6	2	8	7	2	9		5	25	55	10	6
Cas9/Cas9	Y	79	57.6642	70	88.6076	6	2	8	7	2	9		6	57	13	15	31
Cas9/Cas9	Y	83	60.5839	72	86.747	6	2	8	7	2	9		7	61	5	17	18
Cas9/Cas9	Y	94	68.6131	81	86.1702	6	2	8	7	2	9		8	15	49	11	16
Cas9/Cas9	Y	102	74.4526	94	92.1569	6	2	8	7.5	2	9.5		9	36	43	6	31
Cas9/Cas9	Y	73	53.2847	66	90.411	6.5	2	8.5	7.5	2	9.5		10	46	56	10	10
Cas9/Cas9	Y	44	32.1168	39	88.6364	6.5	2	8.5	7.5	2	9.5		11	6	37	21	3
Cas9/Cas9	Y	82	59.854	66	80.4878	6.5	2	8.5	7.5	2	9.5		12	27	47	6	19
Cas9/Cas9	Y	65	47.4453	57	87.6923	6.5	2	8.5	7.5	2	9.5		13	37	3	7	20
Cas9/Cas9	Y	99	72.2628	79	79.798	7	2	9	7.5	2	9.5		14	11	26	14	23
Cas9/Cas9	Y	86	62.7737	62	72.093	7	2	9	7.5	2	9.5		15	43	51	9	17
Cas9/Cas9	Y	107	78.1022	88	82.243	7	2	9	8.5	2	10.5		16	47	53	7	31
Cas9/Cas9	Y	114	83.2117	79	69.2982	7	2	9	8.5	2	10.5		17	34	33	8	28
Cas9/Cas9	Y	83	60.5839	70	84.3373	7	2	9	8.5	2	10.5		18	52	42	20	21
Cas9/Cas9	Y	80	58.3942	57	71.25	7.5	2	9.5	8.5	2	10.5		19	25	43	4	15
Cas9/Cas9	Y	74	54.0146	54	72.973	7.5	2	9.5	8.5	2	10.5		20	30	22	17	18
Cas9/Cas9	Y	92	67.1533	77	83.6957	5.5	2	7.5	6.5	2	8.5		1	26	23	19	18
Cas9/Cas9	Y	84	61.3139	62	73.8095	5.5	2	7.5	6.5	2	8.5		2	23	47	5	21
Cas9/Cas9	Y	91	66.4234	76	83.5165	6	2	8	7	2	9		3	38	36	9	19
Cas9/Cas9	Y	118	86.1314	104	88.1356	6	2	8	7	2	9		4	40	17	22	21
Cas9/Cas9	Y	72	52.5547	65	90.2778	6	2	8	7	2	9		5	16	48	9	23
Cas9/Cas9	Y	78	56.9343	58	74.359	6	2	8	7	2	9		6	35	32	8	19
Cas9/Cas9	Y	88	64.2336	59	67.0455	6	2	8	7	2	9		7	56	12	16	4
Cas9/Cas9	Y	93	67.8832	78	83.871	6	2	8	7	2	9		8	28	46	22	11
Cas9/Cas9	Y	70	51.0949	54	77.1429	6	2	8	7	2	9		9	12	45	11	4
Cas9/Cas9	Y	62	45.2555	57	91.9355	6	2	8	7.5	2	9.5		10	5	7	2	14
Cas9/Cas9	Y	86	62.7737	75	87.2093	6.5	2	8.5	7.5	2	9.5		11	49	50	10	12
Cas9/Cas9	Y	79	57.6642	60	75.9494	6.5	2	8.5	7.5	2	9.5		12	35	48	13	22
Cas9/Cas9	Y	115	83.9416	93	80.8696	6.5	2	8.5	7.5	2	9.5		13	39	27	8	24
Cas9/Cas9	Y	84	61.3139	71	84.5238	6.5	2	8.5	7.5	2	9.5		14	48	19	13	17
Cas9/Cas9	Y	96	70.073	77	80.2083	6.5	2	8.5	7.5	2	9.5		15	2	48	8	27
Cas9/Cas9	Y	91	66.4234	82	90.1099	6.5	2	8.5	7.5	2	9.5		16	44	43	18	6
Cas9/Cas9	Y	82	59.854	65	79.2683	6.5	2	8.5	7.5	2	9.5		17	65	31	8	7
Cas9/Cas9	Y	69	50.365	53	76.8116	7	2	9	7.5	2	9.5		18	32	1	6	17
Cas9/Cas9	Y	107	78.1022	93	86.9159	7	2	9	8.5	2	10.5		19	23	46	11	26
Cas9/Cas9	Y	80	58.3942	64	80	7.5	2	9.5	8.5	2	10.5		20	58	10	7	28
gRNAs/gRNAs	Y	78	56.9343	68	87.1795	5.5	2	7.5	6.5	2	8.5		1	48	45	11	30
gRNAs/gRNAs	Y	92	67.1533	83	90.2174	5.5	2	7.5	6.5	2	8.5		2	25	29	11	15
gRNAs/gRNAs	Y	86	62.7737	74	86.0465	6	2	8	7	2	9		3	52	14	7	23
gRNAs/gRNAs	Y	107	78.1022	95	88.785	6	2	8	7	2	9		4	32	15	19	29
gRNAs/gRNAs	Y	94	68.6131	67	71.2766	6	2	8	7	2	9		5	7	48	9	9
gRNAs/gRNAs	Y	58	42.3358	43	74.1379	6	2	8	7	2	9		6	27	9	9	22
gRNAs/gRNAs	Y	94	68.6131	69	73.4043	6	2	8	7	2	9		7	42	52	9	10
gRNAs/gRNAs	Y	91	66.4234	82	90.1099	6	2	8	7	2	9		8	27	17	11	12
gRNAs/gRNAs	Y	87	63.5036	75	86.2069	6	2	8	7	2	9		9	15	17	19	29
gRNAs/gRNAs	Y	65	47.4453	44	67.6923	6	2	8	7	2	9		10	57	35	19	34
gRNAs/gRNAs	Y	115	83.9416	96	83.4783	6	2	8	7	2	9		11	42	40	10	19
gRNAs/gRNAs	Y	63	45.9854	50	79.3651	6	2	8	7	2	9		12	32	25	17	2
gRNAs/gRNAs	Y	98	71.5328	83	84.6939	6	2	8	7	2	9		13	38	43	8	8
gRNAs/gRNAs	Y	84	61.3139	67	79.7619	6	2	8	7	2	9		14	36	7	3	26
gRNAs/gRNAs	Y	72	52.5547	63	87.5	6.5	2	8.5	7	2	9		15	38	22	13	9
gRNAs/gRNAs	Y	103	75.1825	79	76.699	6.5	2	8.5	7.5	2	9.5		16	42	12	12	18
gRNAs/gRNAs	Y	85	62.0438	68	80	6.5	2	8.5	7.5	2	9.5		17	42	23	5	27
gRNAs/gRNAs	Y	76	55.4745	56	73.6842	6.5	2	8.5	7.5	2	9.5		18	24	57	9	5
gRNAs/gRNAs	Y	94	68.6131	85	90.4255	6.5	2	8.5	7.5	2	9.5		19	19	37	12	14
gRNAs/gRNAs	Y	109	79.562	94	86.2385	6.5	2	8.5	7.5	2	9.5		20	19	12	3	21
gRNAs/gRNAs	Y	115	83.9416	99	86.087	5.5	2	7.5	6.5	2	8.5		1	56	4	11	25
gRNAs/gRNAs	Y	76	55.4745	68	89.4737	6	2	8	7	1.5	8.5		2	34	42	4	7
gRNAs/gRNAs	Y	98	71.5328	82	83.6735	6	2	8	7	2	9		3	55	28	10	22
gRNAs/gRNAs	Y	37	27.0073	31	83.7838	6	2	8	7	2	9		4	37	55	6	15
gRNAs/gRNAs	Y	126	91.9708	110	87.3016	6	2	8	7	2	9		5	25	37	12	4
gRNAs/gRNAs	Y	104	75.9124	89	85.5769	6	2	8	7	2	9		6	51	47	18	20
gRNAs/gRNAs	Y	86	62.7737	73	84.8837	6	2	8	7	2	9		7	28	43	12	24
gRNAs/gRNAs	Y	94	68.6131	76	80.8511	6	2	8	7	2	9		8	34	15	4	29
gRNAs/gRNAs	Y	62	45.2555	50	80.6452	6	2	8	7	2	9		9	17	27	11	17
gRNAs/gRNAs	Y	83	60.5839	69	83.1325	6	2	8	7	2	9		10	47	27	11	14
gRNAs/gRNAs	Y	95	69.3431	85	89.4737	6	2	8	7	2	9		11	2	28	8	27
gRNAs/gRNAs	Y	108	78.8321	82	75.9259	6	2	8	7	2	9		12	31	28	11	1
gRNAs/gRNAs	Y	84	61.3139	71	84.5238	6	2	8	7	2	9		13	34	26	14	19
gRNAs/gRNAs	Y	99	72.2628	74	74.7475	6	2	8	7	2	9		14	55	15	11	20
gRNAs/gRNAs	Y	93	67.8832	80	86.0215	6.5	2	8.5	7.5	2	9.5		15	41	35	7	8
gRNAs/gRNAs	Y	113	82.4818	96	84.9558	6.5	2	8.5	7.5	2	9.5		16	7	29	15	26
gRNAs/gRNAs	Y	94	68.6131	82	87.234	6.5	2	8.5	7.5	2	9.5		17	62	23	7	25
gRNAs/gRNAs	Y	55	40.146	43	78.1818	6.5	2	8.5	7.5	2	9.5		18	39	57	17	21
gRNAs/gRNAs	Y	89	64.9635	71	79.7753	6.5	2	8.5	7.5	2	9.5		19	31	8	12	21
gRNAs/gRNAs	Y	96	70.073	77	80.2083	6.5	2	8.5	7.5	2	9.5		20	45	33	18	30
gRNAs/gRNAs	Y	87	63.5036	73	83.908	5.5	2	7.5	6.5	2	8.5		1	5	18	11	14
gRNAs/gRNAs	Y	82	59.854	65	79.2683	5.5	2	7.5	6.5	2	8.5		2	11	25	6	26
gRNAs/gRNAs	Y	128	93.4307	103	80.4688	6	2	8	7	2	9		3	42	27	19	25
gRNAs/gRNAs	Y	90	65.6934	79	87.7778	6	2	8	7	2	9		4	47	55	9	5
gRNAs/gRNAs	Y	84	61.3139	68	80.9524	6	2	8	7	2	9		5	28	9	15	19
gRNAs/gRNAs	Y	113	82.4818	94	83.1858	6	2	8	7	2	9		6	38	12	19	4
gRNAs/gRNAs	Y	95	69.3431	67	70.5263	6	2	8	7	2	9		7	57	11	9	30
gRNAs/gRNAs	Y	67	48.9051	58	86.5672	6	2	8	7	2	9		8	55	3	8	23
gRNAs/gRNAs	Y	94	68.6131	81	86.1702	6	2	8	7	2	9		9	61	26	20	28
gRNAs/gRNAs	Y	58	42.3358	45	77.5862	6	2	8	7	2	9		10	43	52	3	3
gRNAs/gRNAs	Y	103	75.1825	92	89.3204	6	2	8	7	2	9		11	35	31	14	9
gRNAs/gRNAs	Y	92	67.1533	78	84.7826	6	2	8	7	2	9		12	56	42	17	31
gRNAs/gRNAs	Y	75	54.7445	55	73.3333	6	2	8	7	2	9		13	22	46	2	28
gRNAs/gRNAs	Y	49	35.7664	36	73.4694	6	2	8	7	2	9		14	6	23	14	17
gRNAs/gRNAs	Y	86	62.7737	73	84.8837	6	2	8	7.5	2	9.5		15	51	39	15	33
gRNAs/gRNAs	Y	96	70.073	79	82.2917	6.5	2	8.5	7.5	2	9.5		16	29	31	13	4
gRNAs/gRNAs	Y	88	64.2336	74	84.0909	6.5	2	8.5	7.5	2	9.5		17	60	43	4	13
gRNAs/gRNAs	Y	109	79.562	88	80.7339	6.5	2	8.5	7.5	2	9.5		18	19	45	13	31
gRNAs/gRNAs	Y	78	56.9343	60	76.9231	6.5	2	8.5	7.5	2	9.5		19	28	34	15	29
gRNAs/gRNAs	Y	91	66.4234	73	80.2198	6.5	2	8.5	7.5	2	9.5		20	5	63	16	32	Adult ♀/⚥ (can not escaped from pupa shell) longevity (days)
gRNAs♂/+;Cas9♀/+	N	0	0	0	-	6	2	8	7	2	9		1	5	19	3	15	1
gRNAs♂/+;Cas9♀/+	N	0	0	0	-	6	2	8	7	2	9		2	7	9	17	22	1
gRNAs♂/+;Cas9♀/+	N	0	0	0	-	6	2	8	7	2	9		3	15	20	4	17	1
gRNAs♂/+;Cas9♀/+	N	0	0	0	-	6.5	2	8.5	7.5	2	9.5		4	18	20	21	26	1
gRNAs♂/+;Cas9♀/+	N	0	0	0	-	6.5	2	8.5	7.5	2	9.5		5	11	15	8	5	1
gRNAs♂/+;Cas9♀/+	N	0	0	0	-	6.5	2	8.5	7.5	2	9.5		6	13	5	9	26	1
gRNAs♂/+;Cas9♀/+	N	0	0	0	-	6.5	2	8.5	7.5	2	9.5		7	15	14	12	26	1
gRNAs♂/+;Cas9♀/+	N	0	0	0	-	6.5	2	8.5	7.5	2	9.5		8	11	13	9	15	1
gRNAs♂/+;Cas9♀/+	N	0	0	0	-	6.5	2	8.5	7.5	2	9.5		9	9	1	9	3	1
gRNAs♂/+;Cas9♀/+	N	0	0	0	-	7	2	9	7.5	2	9.5		10	16	7	14	2	1
gRNAs♂/+;Cas9♀/+	N	0	0	0	-	7	2	9	7.5	2	9.5		11	2	9	9	9	1
gRNAs♂/+;Cas9♀/+	N	0	0	0	-	7	2	9	7.5	2	9.5		12	10	9	5	17	1
gRNAs♂/+;Cas9♀/+	N	0	0	0	-	7	2	9	7.5	2	9.5		13	7	3	3	18	1
gRNAs♂/+;Cas9♀/+	N	0	0	0	-	7	2	9	8	2	10		14	2	15	10	16	1
gRNAs♂/+;Cas9♀/+	N	0	0	0	-	7	2	9	8	2	10		15	4	8	11	3	1
gRNAs♂/+;Cas9♀/+	N	0	0	0	-	7	2	9	8	2	10		16	7	7	12	33	1
gRNAs♂/+;Cas9♀/+	N	0	0	0	-	7.5	2	9.5	8	2	10		17	8	8	20	10	1
gRNAs♂/+;Cas9♀/+	N	0	0	0	-	7.5	2	9.5	8	2	10		18	11	5	10	17	1
gRNAs♂/+;Cas9♀/+	N	0	0	0	-	7.5	2	9.5	8	2	10		19	1	7	20	2	1
gRNAs♂/+;Cas9♀/+	N	0	0	0	-	7.5	2	9.5	8	2.5	10.5		20	9	2	10	25	1
gRNAs♂/+;Cas9♀/+	N	0	0	0	-	6	2	8	7	2	9		1	10	4	11	2	1
gRNAs♂/+;Cas9♀/+	N	0	0	0	-	6	2	8	7	2	9		2	9	7	18	14	1
gRNAs♂/+;Cas9♀/+	N	0	0	0	-	6.5	2	8.5	7.5	2	9.5		3	7	15	3	7	1
gRNAs♂/+;Cas9♀/+	N	0	0	0	-	6.5	2	8.5	7.5	2	9.5		4	4	19	13	31	1
gRNAs♂/+;Cas9♀/+	N	0	0	0	-	6.5	2	8.5	7.5	2	9.5		5	13	5	17	30	1
gRNAs♂/+;Cas9♀/+	N	0	0	0	-	6.5	2	8.5	7.5	2	9.5		6	15	10	7	28	1
gRNAs♂/+;Cas9♀/+	N	0	0	0	-	6.5	2	8.5	7.5	2	9.5		7	15	9	13	29	1
gRNAs♂/+;Cas9♀/+	N	0	0	0	-	7	2	9	7.5	2	9.5		8	3	9	13	33	1
gRNAs♂/+;Cas9♀/+	N	0	0	0	-	7	2	9	7.5	2	9.5		9	6	3	11	8	1
gRNAs♂/+;Cas9♀/+	N	0	0	0	-	7	2	9	7.5	2	9.5		10	16	9	12	19	1
gRNAs♂/+;Cas9♀/+	N	0	0	0	-	7	2	9	7.5	2	9.5		11	17	9	10	2	1
gRNAs♂/+;Cas9♀/+	N	0	0	0	-	7	2	9	7.5	2	9.5		12	11	18	11	28	1
gRNAs♂/+;Cas9♀/+	N	0	0	0	-	7	2	9	7.5	2	9.5		13	12	7	12	15	1
gRNAs♂/+;Cas9♀/+	N	0	0	0	-	7	2	9	7.5	2	9.5		14	9	13	11	25	1
gRNAs♂/+;Cas9♀/+	N	0	0	0	-	7	2	9	8	2	10		15	11	10	17	32	1
gRNAs♂/+;Cas9♀/+	N	0	0	0	-	7	2	9	8	2	10		16	10	2	3	20	1
gRNAs♂/+;Cas9♀/+	N	0	0	0	-	7.5	2	9.5	8	2	10		17	2	14	2	24	1
gRNAs♂/+;Cas9♀/+	N	0	0	0	-	7.5	2	9.5	8	2	10		18	7	15	14	28	1
gRNAs♂/+;Cas9♀/+	N	0	0	0	-	7.5	2	9.5	8	2	10		19	2	5	8	12	1
gRNAs♂/+;Cas9♀/+	N	0	0	0	-	8	2	10	8	2	10		20	9	21	15	2	1
gRNAs♂/+;Cas9♀/+	N	0	0	0	-	6.5	2	8.5	7.5	2	9.5		1	9	11	2	13	1
gRNAs♂/+;Cas9♀/+	N	0	0	0	-	6.5	2	8.5	7.5	2	9.5		2	10	16	17	10	1
gRNAs♂/+;Cas9♀/+	N	0	0	0	-	6.5	2	8.5	7.5	2	9.5		3	2	13	5	22	1
gRNAs♂/+;Cas9♀/+	N	0	0	0	-	6.5	2	8.5	7.5	2	9.5		4	11	4	11	28	1
gRNAs♂/+;Cas9♀/+	N	0	0	0	-	6.5	2	8.5	7.5	2	9.5		5	14	19	11	29	1
gRNAs♂/+;Cas9♀/+	N	0	0	0	-	6.5	2	8.5	7.5	2	9.5		6	9	9	7	4	1
gRNAs♂/+;Cas9♀/+	N	0	0	0	-	6.5	2	8.5	7.5	2	9.5		7	7	2	10	27	1
gRNAs♂/+;Cas9♀/+	N	0	0	0	-	6.5	2	8.5	7.5	2	9.5		8	12	2	4	29	1
gRNAs♂/+;Cas9♀/+	N	0	0	0	-	6.5	2	8.5	7.5	2	9.5		9	15	9	11	26	1
gRNAs♂/+;Cas9♀/+	N	0	0	0	-	6.5	2	8.5	7.5	2	9.5		10	11	7	10	29	1
gRNAs♂/+;Cas9♀/+	N	0	0	0	-	6.5	2	8.5	7.5	2	9.5		11	15	19	9	29	1
gRNAs♂/+;Cas9♀/+	N	0	0	0	-	7	2	9	7.5	2	9.5		12	3	16	3	27	1
gRNAs♂/+;Cas9♀/+	N	0	0	0	-	7	2	9	8	2	10		13	8	13	13	15	1
gRNAs♂/+;Cas9♀/+	N	0	0	0	-	7	2	9	8	2	10		14	12	16	11	9	1
gRNAs♂/+;Cas9♀/+	N	0	0	0	-	7	2	9	8	2	10		15	15	9	10	6	1
gRNAs♂/+;Cas9♀/+	N	0	0	0	-	7.5	2	9.5	8	2	10		16	12	6	4	7	1
gRNAs♂/+;Cas9♀/+	N	0	0	0	-	7.5	2	9.5	8	2	10		17	5	16	12	13	1
gRNAs♂/+;Cas9♀/+	N	0	0	0	-	7.5	2	9.5	8	2	10		18	6	8	16	30	1
gRNAs♂/+;Cas9♀/+	N	0	0	0	-	7.5	2	9.5	8	2	10		19	3	4	17	17	1
gRNAs♂/+;Cas9♀/+	N	0	0	0	-	7.5	2	9.5	8	2	10		20	1	12	10	4	1
gRNAs♀/+;Cas9♂/+	N	0	0	0	-	6.5	2	8.5	7.5	2	9.5		1	14	9	10	20	1
gRNAs♀/+;Cas9♂/+	N	0	0	0	-	6.5	2	8.5	7.5	2	9.5		2	11	11	16	3	1
gRNAs♀/+;Cas9♂/+	N	0	0	0	-	6.5	2	8.5	7.5	2	9.5		3	4	16	11	24	1
gRNAs♀/+;Cas9♂/+	N	0	0	0	-	6.5	2	8.5	7.5	2	9.5		4	8	17	5	5	1
gRNAs♀/+;Cas9♂/+	Y	0	0	0	-	6.5	2	8.5	7.5	2	9.5		5	17	4	11	4	1
gRNAs♀/+;Cas9♂/+	N	0	0	0	-	6.5	2	8.5	7.5	2	9.5		6	6	2	14	27	1
gRNAs♀/+;Cas9♂/+	N	0	0	0	-	6.5	2	8.5	7.5	2	9.5		7	5	11	13	29	1
gRNAs♀/+;Cas9♂/+	Y	0	0	0	-	6.5	2	8.5	7.5	2	9.5		8	11	13	18	25	1
gRNAs♀/+;Cas9♂/+	N	0	0	0	-	6.5	2	8.5	8	2	10		9	18	19	9	34	1
gRNAs♀/+;Cas9♂/+	N	0	0	0	-	6.5	2	8.5	8	2	10		10	3	9	14	3	1
gRNAs♀/+;Cas9♂/+	N	0	0	0	-	7	2	9	8	2	10		11	8	6	10	22	1
gRNAs♀/+;Cas9♂/+	N	0	0	0	-	7	2	9	8	2	10		12	4	20	14	19	1
gRNAs♀/+;Cas9♂/+	N	0	0	0	-	7	2	9	8	2	10		13	11	15	2	6	1
gRNAs♀/+;Cas9♂/+	N	0	0	0	-	7	2	9	8	2	10		14	14	13	4	25	1
gRNAs♀/+;Cas9♂/+	N	0	0	0	-	7	2	9	8	2	10		15	9	7	17	21	1
gRNAs♀/+;Cas9♂/+	Y	0	0	0	-	7.5	2	9.5	8	2	10		16	14	8	10	13	1
gRNAs♀/+;Cas9♂/+	N	0	0	0	-	7.5	2	9.5	8	2	10		17	15	4	6	9	1
gRNAs♀/+;Cas9♂/+	N	0	0	0	-	7.5	2	9.5	8	2	10		18	15	16	13	17	1
gRNAs♀/+;Cas9♂/+	N	0	0	0	-	7.5	2	9.5	8	2	10		19	5	4	4	15	1
gRNAs♀/+;Cas9♂/+	N	0	0	0	-	7.5	2	9.5	8	2	10		20	14	10	7	15	1
gRNAs♀/+;Cas9♂/+	Y	0	0	0	-	6.5	2	8.5	7.5	2	9.5		1	14	2	5	19	1
gRNAs♀/+;Cas9♂/+	N	0	0	0	-	6.5	2	8.5	7.5	2	9.5		2	8	11	10	9	1
gRNAs♀/+;Cas9♂/+	N	0	0	0	-	6.5	2	8.5	7.5	2	9.5		3	3	5	5	25	1
gRNAs♀/+;Cas9♂/+	N	0	0	0	-	6.5	2	8.5	7.5	2	9.5		4	14	19	13	8	1
gRNAs♀/+;Cas9♂/+	N	0	0	0	-	6.5	2	8.5	7.5	2	9.5		5	12	9	6	9	1
gRNAs♀/+;Cas9♂/+	N	0	0	0	-	7	2	9	7.5	2	9.5		6	1	4	21	14	1
gRNAs♀/+;Cas9♂/+	N	0	0	0	-	7	2	9	7.5	2	9.5		7	8	11	5	8	1
gRNAs♀/+;Cas9♂/+	N	0	0	0	-	7	2	9	7.5	2	9.5		8	14	16	14	23	1
gRNAs♀/+;Cas9♂/+	N	0	0	0	-	7	2	9	7.5	2	9.5		9	13	11	11	8	1
gRNAs♀/+;Cas9♂/+	N	0	0	0	-	7	2	9	7.5	2	9.5		10	6	8	12	16	1
gRNAs♀/+;Cas9♂/+	N	0	0	0	-	7	2	9	7.5	2	9.5		11	8	19	5	24	1
gRNAs♀/+;Cas9♂/+	Y	0	0	0	-	7	2	9	8	2	10		12	11	16	13	9	1
gRNAs♀/+;Cas9♂/+	Y	0	0	0	-	7	2	9	8	2	10		13	17	13	13	21	1
gRNAs♀/+;Cas9♂/+	N	0	0	0	-	7	2	9	8	2	10		14	11	3	10	28	1
gRNAs♀/+;Cas9♂/+	N	0	0	0	-	7	2	9	8	2	10		15	19	3	3	15	1
gRNAs♀/+;Cas9♂/+	N	0	0	0	-	7.5	2	9.5	8	2	10		16	15	5	9	24	1
gRNAs♀/+;Cas9♂/+	N	0	0	0	-	7.5	2	9.5	8	2	10		17	10	16	19	28	1
gRNAs♀/+;Cas9♂/+	N	0	0	0	-	7.5	2	9.5	8	2	10		18	5	12	13	20	1
gRNAs♀/+;Cas9♂/+	N	0	0	0	-	7.5	2	9.5	8	2	10		19	1	9	16	28	1
gRNAs♀/+;Cas9♂/+	Y	0	0	0	-	7.5	2	9.5	8	2	10		20	15	17	11	5	1
gRNAs♀/+;Cas9♂/+	N	0	0	0	-	6.5	2	8.5	7	2	9		1	15	16	17	18	1
gRNAs♀/+;Cas9♂/+	N	0	0	0	-	6.5	2	8.5	7	2	9		2	1	8	17	8	1
gRNAs♀/+;Cas9♂/+	N	0	0	0	-	6.5	2	8.5	7.5	2	9.5		3	6	10	9	22	1
gRNAs♀/+;Cas9♂/+	N	0	0	0	-	6.5	2	8.5	7.5	2	9.5		4	1	24	8	26	1
gRNAs♀/+;Cas9♂/+	Y	0	0	0	-	6.5	2	8.5	7.5	2	9.5		5	14	8	7	28	1
gRNAs♀/+;Cas9♂/+	N	0	0	0	-	6.5	2	8.5	7.5	2	9.5		6	13	4	11	26	1
gRNAs♀/+;Cas9♂/+	N	0	0	0	-	6.5	2	8.5	7.5	2	9.5		7	8	9	7	17	1
gRNAs♀/+;Cas9♂/+	N	0	0	0	-	7	2	9	7.5	2	9.5		8	14	19	9	22	1
gRNAs♀/+;Cas9♂/+	N	0	0	0	-	7	2	9	7.5	2	9.5		9	15	11	13	10	1
gRNAs♀/+;Cas9♂/+	N	0	0	0	-	7	2	9	7.5	2	9.5		10	5	17	15	14	1
gRNAs♀/+;Cas9♂/+	N	0	0	0	-	7	2	9	7.5	2	9.5		11	10	5	21	9	1
gRNAs♀/+;Cas9♂/+	N	0	0	0	-	7	2	9	7.5	2	9.5		12	11	13	13	28	1
gRNAs♀/+;Cas9♂/+	Y	0	0	0	-	7	2	9	8	2	10		13	17	11	13	6	1
gRNAs♀/+;Cas9♂/+	N	0	0	0	-	7	2	9	8	2	10		14	8	13	5	29	1
gRNAs♀/+;Cas9♂/+	N	0	0	0	-	7	2	9	8	2	10		15	12	5	4	5	1
gRNAs♀/+;Cas9♂/+	Y	0	0	0	-	7	2	9	8	2	10		16	19	13	17	22	1
gRNAs♀/+;Cas9♂/+	N	0	0	0	-	7	2	9	8	2	10		17	14	4	19	23	1
gRNAs♀/+;Cas9♂/+	N	0	0	0	-	7.5	2	9.5	8	2	10		18	8	17	17	9	1
gRNAs♀/+;Cas9♂/+	N	0	0	0	-	7.5	2	9.5	8	2	10		19	3	7	17	7	1
gRNAs♀/+;Cas9♂/+	N	0	0	0	-	7.5	2	9.5	8	2	10		20	11	16	13	6	1
	maximum =>	137

## Sheet: Supp Table 8
Supplementary Table 8. pgSIT males sterilize WT females
		gonotrophic cycle #1					gonotrophic cycle #2					gonotrophic cycle #3					gonotrophic cycle #4					gonotrophic cycle #5						total ♀ fertility %
experimental group	group name	♀ # took blood (1)	♀ # laid eggs (1)	fertile ♀ # (1)	sterile ♀ # (1)	♀ fertility % (1)	♀ # took blood (2)	♀ # laid eggs (2)	fertile ♀ # (2)	sterile ♀ # (2)	♀ fertility % (2)	♀ # took blood (3)	♀ # laid eggs (3)	fertile ♀ # (3)	sterile ♀ # (3)	♀ fertility % (3)	♀ # took blood (4)	♀ # laid eggs (4)	fertile ♀ # (4)	sterile ♀ # (4)	♀ fertility % (4)	♀ # took blood (5)	♀ # laid eggs (5)	fertile ♀ # (5)	sterile ♀ # (5)	♀ fertility % (5)	Maximum tested ♀ #	Maximum fertile ♀ #	Maximum ♀ fertility %
50 WT♀ X 250 WT♂ *	WT ♂	47	47	47	0	100	41	41	41	0	100	35	35	35	0	100	28	28	28	0	100	20	20	20	0	100	47	47	100
50 WT♀ X 250 WT♂ *	WT ♂	47	47	47	0	100	39	39	39	0	100	36	36	36	0	100	23	23	23	0	100	15	15	15	0	100	47	47	100
50 WT♀ X 250 WT♂ *	WT ♂	49	49	49	0	100	42	42	42	0	100	32	32	32	0	100	25	25	25	0	100	17	17	17	0	100	49	49	100
50 WT♀ †	no WT ♂	45	40	0	40	0	34	33	0	33	0	27	27	0	27	0	25	20	0	20	0	13	10	0	10	0	45	0	0
50 WT♀ †	no WT ♂	43	41	0	41	0	38	32	0	32	0	27	26	0	26	0	24	21	0	21	0	14	9	0	9	0	43	0	0
50 WT♀ †	no WT ♂	47	43	0	43	0	38	35	0	35	0	26	22	0	22	0	17	14	0	14	0	8	5	0	5	0	47	0	0
50 WT♀ after 1st gonotrophic cycle X 250 WT♂ †	later WT ♂	48	45	0	45	0	39	36	36	0	100	29	28	28	0	100	23	20	20	0	100	12	9	9	0	100	36	36	100
50 WT♀ after 1st gonotrophic cycle X 250 WT♂ †	later WT ♂	45	45	0	45	0	42	42	42	0	100	35	30	30	0	100	22	17	17	0	100	11	6	6	0	100	42	42	100
50 WT♀ after 1st gonotrophic cycle X 250 WT♂ †	later WT ♂	48	46	0	46	0	41	39	39	0	100	34	32	32	0	100	25	19	19	0	100	14	12	12	0	100	39	39	100
50 WT♀ X 250 pgSIT♂[Cas9♀](2hr) X 250 WT ♂(2days) †	2H-pgSIT♂[Cas9♀]	49	46	29	17	63.0435	16	15	0	15	0	11	9	0	9	0	7	7	0	7	0	2	0	0	0	0	46	29	63.0435
50 WT♀ X 250 pgSIT♂[Cas9♀](2hr) X 250 WT ♂(2days) †	2H-pgSIT♂[Cas9♀]	50	48	36	12	75	10	10	0	10	0	7	5	0	5	0	4	4	0	4	0	0	0	0	0	0	48	36	75
50 WT♀ X 250 pgSIT♂[Cas9♀](2hr) X 250 WT ♂(2days) †	2H-pgSIT♂[Cas9♀]	46	46	28	18	60.8696	14	12	0	12	0	10	9	1	8	11.1111	6	5	0	5	0	3	1	0	1	0	46	28	60.8696
50 WT♀ X 250 pgSIT♂[Cas9♀](6hr) X 250 WT ♂(2days) †	6H-pgSIT♂[Cas9♀]	48	46	25	21	54.3478	20	18	0	18	0	14	10	0	10	0	5	3	0	3	0	0	0	0	0	0	46	25	54.3478
50 WT♀ X 250 pgSIT♂[Cas9♀](6hr) X 250 WT ♂(2days) †	6H-pgSIT♂[Cas9♀]	49	45	27	18	60	15	13	0	13	0	9	8	0	8	0	5	4	0	4	0	1	1	0	1	0	45	27	60
50 WT♀ X 250 pgSIT♂[Cas9♀](6hr) X 250 WT ♂(2days) †	6H-pgSIT♂[Cas9♀]	48	47	22	25	46.8085	23	23	0	23	0	19	16	0	16	0	12	8	1	7	12.5	5	5	0	5	0	47	22	46.8085
50 WT♀ X 250 pgSIT♂[Cas9♀](12hr) X 250 WT ♂(2days) †	12H-pgSIT♂[Cas9♀]	50	46	9	37	19.5652	34	28	0	28	0	22	21	0	21	0	15	12	0	12	0	5	5	0	5	0	46	9	19.5652
50 WT♀ X 250 pgSIT♂[Cas9♀](12hr) X 250 WT ♂(2days) †	12H-pgSIT♂[Cas9♀]	48	47	13	34	27.6596	30	28	0	28	0	23	19	0	19	0	13	13	0	13	0	3	3	0	3	0	47	13	27.6596
50 WT♀ X 250 pgSIT♂[Cas9♀](12hr) X 250 WT ♂(2days) †	12H-pgSIT♂[Cas9♀]	47	43	11	32	25.5814	25	20	0	20	0	15	15	0	15	0	14	12	0	12	0	9	7	0	7	0	43	11	25.5814
50 WT♀ X 250 pgSIT♂[Cas9♀](24hr) X 250 WT ♂(2days) †	24H-pgSIT♂[Cas9♀]	43	43	1	42	2.32558	37	37	0	37	0	33	31	0	31	0	22	22	0	22	0	12	8	0	8	0	43	1	2.32558
50 WT♀ X 250 pgSIT♂[Cas9♀](24hr) X 250 WT ♂(2days) †	24H-pgSIT♂[Cas9♀]	48	45	3	42	6.66667	33	30	0	30	0	25	25	0	25	0	21	17	0	17	0	7	4	0	4	0	45	3	6.66667
50 WT♀ X 250 pgSIT♂[Cas9♀](24hr) X 250 WT ♂(2days) †	24H-pgSIT♂[Cas9♀]	49	48	4	44	8.33333	42	39	0	39	0	36	35	0	35	0	21	19	0	19	0	13	11	0	11	0	48	4	8.33333
50 WT♀ X 250 pgSIT♂[Cas9♀](48hr) X 250 WT ♂(2days) †	48H-pgSIT♂[Cas9♀]	49	47	1	46	2.12766	40	38	0	38	0	31	28	0	28	0	23	18	0	18	0	5	5	0	5	0	47	1	2.12766
50 WT♀ X 250 pgSIT♂[Cas9♀](48hr) X 250 WT ♂(2days) †	48H-pgSIT♂[Cas9♀]	46	46	2	44	4.34783	42	37	0	37	0	28	22	0	22	0	16	11	0	11	0	7	5	0	5	0	46	2	4.34783
50 WT♀ X 250 pgSIT♂[Cas9♀](48hr) X 250 WT ♂(2days) †	48H-pgSIT♂[Cas9♀]	47	45	0	45	0	38	32	0	32	0	22	18	0	18	0	12	7	0	7	0	4	2	0	2	0	45	0	0
50 WT♀ X 250 pgSIT♂[Cas9♂](2hr) X 250 WT ♂(2days) †	2H-pgSIT♂[Cas9♂]	50	45	26	19	57.7778	17	17	0	17	0	12	11	0	11	0	6	6	0	6	0	1	1	0	0	0	50	26	52
50 WT♀ X 250 pgSIT♂[Cas9♂](2hr) X 250 WT ♂(2days) †	2H-pgSIT♂[Cas9♂]	47	47	32	15	68.0851	13	11	0	11	0	8	7	0	7	0	3	2	0	2	0	1	1	0	0	0	47	32	68.0851
50 WT♀ X 250 pgSIT♂[Cas9♂](2hr) X 250 WT ♂(2days) †	2H-pgSIT♂[Cas9♂]	49	49	26	23	53.0612	21	20	0	20	0	15	11	0	11	0	7	4	0	4	0	3	2	0	1	0	49	26	53.0612
50 WT♀ X 250 pgSIT♂[Cas9♂](6hr) X 250 WT ♂(2days) †	6H-pgSIT♂[Cas9♂]	50	49	27	22	55.102	22	22	0	22	0	17	12	0	12	0	6	6	0	6	0	2	2	0	0	0	50	27	54
50 WT♀ X 250 pgSIT♂[Cas9♂](6hr) X 250 WT ♂(2days) †	6H-pgSIT♂[Cas9♂]	48	47	23	24	48.9362	21	20	0	20	0	15	12	0	12	0	8	7	0	7	0	2	1	0	1	0	48	23	47.9167
50 WT♀ X 250 pgSIT♂[Cas9♂](6hr) X 250 WT ♂(2days) †	6H-pgSIT♂[Cas9♂]	49	49	20	29	40.8163	25	22	0	22	0	17	15	0	15	0	9	9	0	9	0	3	3	0	5	0	49	20	40.8163
50 WT♀ X 250 pgSIT♂[Cas9♂](12hr) X 250 WT ♂(2days) †	12H-pgSIT♂[Cas9♂]	48	47	10	37	21.2766	35	33	0	33	0	26	20	0	20	0	13	10	0	10	0	6	6	0	5	0	48	10	20.8333
50 WT♀ X 250 pgSIT♂[Cas9♂](12hr) X 250 WT ♂(2days) †	12H-pgSIT♂[Cas9♂]	49	49	9	40	18.3673	36	36	0	36	0	25	21	0	21	0	15	14	0	14	0	5	2	0	3	0	49	9	18.3673
50 WT♀ X 250 pgSIT♂[Cas9♂](12hr) X 250 WT ♂(2days) †	12H-pgSIT♂[Cas9♂]	46	46	12	34	26.087	32	29	0	29	0	20	16	0	16	0	9	7	0	7	0	2	0	0	7	0	46	12	26.087
50 WT♀ X 250 pgSIT♂[Cas9♂](24hr) X 250 WT ♂(2days) †	24H-pgSIT♂[Cas9♂]	50	49	2	47	4.08163	40	37	0	37	0	24	18	0	18	0	11	10	0	10	0	5	4	0	8	0	50	2	4
50 WT♀ X 250 pgSIT♂[Cas9♂](24hr) X 250 WT ♂(2days) †	24H-pgSIT♂[Cas9♂]	49	47	1	46	2.12766	42	39	0	39	0	27	24	0	24	0	18	15	1	15	6.66667	6	6	0	4	0	49	2	4.08163
50 WT♀ X 250 pgSIT♂[Cas9♂](24hr) X 250 WT ♂(2days) †	24H-pgSIT♂[Cas9♂]	47	47	3	44	6.38298	41	36	0	36	0	31	28	0	28	0	20	18	0	18	0	11	9	0	11	0	47	3	6.38298
50 WT♀ X 250 pgSIT♂[Cas9♂](48hr) X 250 WT ♂(2days) †	48H-pgSIT♂[Cas9♂]	48	48	0	48	0	42	37	0	37	0	30	25	0	25	0	17	16	0	16	0	8	8	0	5	0	48	0	0
50 WT♀ X 250 pgSIT♂[Cas9♂](48hr) X 250 WT ♂(2days) †	48H-pgSIT♂[Cas9♂]	49	47	1	46	2.12766	39	35	0	35	0	29	20	0	20	0	13	13	0	13	0	3	1	0	5	0	49	1	2.04082
50 WT♀ X 250 pgSIT♂[Cas9♂](48hr) X 250 WT ♂(2days) †	48H-pgSIT♂[Cas9♂]	50	48	1	47	2.08333	44	41	0	41	0	32	24	0	24	0	15	14	0	14	0	6	3	0	2	0	50	1	2
*We transferred all females that took blood, and since all of them can lay eggs, and eggs can hatch, we repeat this 5 gonotropic cycles
† non-fertile ♀’s were then placed back into cages along with the original WT ♂ s (plus 50 new mature WT ♂ s) for another chance to produce progeny. This was repeated for up to five gonotrophic cycles.

## Sheet: Supp Table 9
Supplementary Table 9. Data on population suppression.
Cage ID	Replicate #	Genotypes Crossed	Generation 1										Generation 2										Generation 3										Generation 4										Generation 5
			Laid egg #	Normalized laid eggs	Selected egg #	Hatched selected egg #	Hatching rate	Genotype of larvae	Left egg #	Hatched left egg #	Hatching rate of left eggs	Genotype of larvae	Laid egg #	Normalized laid eggs	Selected egg #	Hatched selected egg #	Hatching rate	Genotype of larvae	Left egg #	Hatched left egg #	Hatching rate of left eggs	Genotype of larvae	Laid egg #	Normalized laid eggs	Selected egg #	Hatched selected egg #	Hatching rate	Genotype of larvae	Left egg #	Hatched left egg #	Hatching rate of left eggs	Genotype of larvae	Laid egg #	Normalized laid eggs	Selected egg #	Hatched selected egg #	Hatching rate	Genotype of larvae	Left egg #	Hatched left egg #	Hatching rate of left eggs	Genotype of larvae	Laid egg #	Normalized laid eggs	Selected egg #	Hatched selected egg #	Hatching rate	Genotype of larvae	Left egg #
cage1	Replicate 1	50 WT♂ X 50 WT♀	4665	90.1798	100	94	94	+/+	4565	4338	95.0274	+/+	4793	92.6542	100	95	95	+/+	4693	4421	94.2041	+/+	4860	93.9494	100	93	93	+/+	4760	4472	93.9496	+/+	5059	97.7962	100	95	95	+/+	4959	4748	95.7451	+/+	4752	91.8616	100	95	95	+/+	4652
cage2	Replicate 2	50 WT♂ X 50 WT♀	4371	84.4964	100	96	96	+/+	4271	4009	93.8656	+/+	4574	88.4206	100	95	95	+/+	4474	4317	96.4908	+/+	4426	85.5596	100	95	95	+/+	4326	4155	96.0472	+/+	4781	92.4222	100	95	95	+/+	4681	4396	93.9116	+/+	4683	90.5277	100	92	92	+/+	4583
cage3	Replicate 3	50 WT♂ X 50 WT♀	5112	98.8208	100	94	94	+/+	5012	4791	95.5906	+/+	4886	94.452	100	94	94	+/+	4786	4595	96.0092	+/+	4512	87.2221	100	94	94	+/+	4412	4106	93.0644	+/+	4239	81.9447	100	96	96	+/+	4139	3899	94.2015	+/+	4862	93.988	100	95	95	+/+	4762
cage4	Replicate 1	50 gRNA[dsx,ix,βTub]/gRNA[dsx,ix,βTub]♂ X 50 WT♀	4573	88.4013	100	86	86	gRNA/+	4473	3879	86.7203	gRNA/+	4682	90.5084	100	85	85	gRNA/gRNA; gRNA/+; +/+	4582	3927	85.7049	gRNA/gRNA; gRNA/+; +/+	4759	91.9969	100	83	83	gRNA/gRNA; gRNA/+; +/+	4659	3995	85.748	gRNA/gRNA; gRNA/+; +/+	4315	83.4139	100	84	84	gRNA/gRNA; gRNA/+; +/+	4215	3534	83.8434	gRNA/gRNA; gRNA/+; +/+	4186	80.9202	100	86	86	gRNA/gRNA; gRNA/+; +/+	4086
cage5	Replicate 2	50 gRNA[dsx,ix,βTub]/gRNA[dsx,ix,βTub]♂ X 50 WT♀	4436	85.7529	100	84	84	gRNA/+	4336	3666	84.548	gRNA/+	4528	87.5314	100	83	83	gRNA/gRNA; gRNA/+; +/+	4428	3754	84.7787	ggRNA/gRNA; gRNA/+; +/+	4873	94.2007	100	82	82	gRNA/gRNA; gRNA/+; +/+	4773	3893	81.563	gRNA/gRNA; gRNA/+; +/+	4193	81.0555	100	86	86	gRNA/gRNA; gRNA/+; +/+	4093	3391	82.8488	gRNA/gRNA; gRNA/+; +/+	4467	86.3522	100	84	84	gRNA/gRNA; gRNA/+; +/+	4367
cage6	Replicate 3	50 gRNA[dsx,ix,βTub]/gRNA[dsx,ix,βTub]♂ X 50 WT♀	4792	92.6348	100	83	83	gRNA/+	4692	3823	81.4791	gRNA]/+	3984	77.0153	100	86	86	gRNA/gRNA; gRNA/+; +/+	3884	3226	83.0587	gRNA/gRNA; gRNA/+; +/+	4247	82.0994	100	84	84	gRNA/gRNA; gRNA/+; +/+	4147	3592	86.6168	gRNA/gRNA; gRNA/+; +/+	4672	90.3151	100	83	83	gRNA/gRNA; gRNA/+; +/+	4572	3827	83.7052	gRNA/gRNA; gRNA/+; +/+	4459	86.1976	100	87	87	gRNA/gRNA; gRNA/+; +/+	4359
cage7	Replicate 1	50 Cas9/Cas9♂ X 50 WT♀	3862	74.6569	100	81	81	Cas9/+	3762	3011	80.0372	Cas9/+	4299	83.1046	100	84	84	Cas9/Cas9; Cas9/+; +/+	4199	3522	83.8771	Cas9/Cas9; Cas9/+; +/+	4358	84.2451	100	84	84	Cas9/Cas9; Cas9/+; +/+	4258	3504	82.2922	Cas9/Cas9; Cas9/+; +/+	3892	75.2368	100	80	80	Cas9/Cas9; Cas9/+; +/+	3792	3185	83.9926	Cas9/Cas9; Cas9/+; +/+	3770	72.8784	100	83	83	Cas9/Cas9; Cas9/+; +/+	3670
cage8	Replicate 2	50 Cas9/Cas9♂ X 50 WT♀	4277	82.6793	100	78	78	Cas9/+	4177	3313	79.3153	Cas9/+	4152	80.2629	100	82	82	Cas9/Cas9; Cas9/+; +/+	4052	3315	81.8115	Cas9/Cas9; Cas9/+; +/+	3974	76.822	100	81	81	Cas9/Cas9; Cas9/+; +/+	3874	3117	80.4595	Cas9/Cas9; Cas9/+; +/+	4445	85.9269	100	83	83	Cas9/Cas9; Cas9/+; +/+	4345	3518	80.9666	Cas9/Cas9; Cas9/+; +/+	4018	77.6725	100	84	84	Cas9/Cas9; Cas9/+; +/+	3918
cage9	Replicate 3	50 Cas9/Cas9♂ X 50 WT♀	4158	80.3789	100	83	83	Cas9/+	4058	3427	84.4505	Cas9/+	4254	82.2347	100	81	81	Cas9/Cas9; Cas9/+; +/+	4154	3328	80.1156	Cas9/Cas9; Cas9/+; +/+	4171	80.6302	100	83	83	Cas9/Cas9; Cas9/+; +/+	4071	3399	83.493	Cas9/Cas9; Cas9/+; +/+	4283	82.7953	100	84	84	Cas9/Cas9; Cas9/+; +/+	4183	3419	81.7356	Cas9/Cas9; Cas9/+; +/+	4032	77.9432	100	78	78	Cas9/Cas9; Cas9/+; +/+	3932
cage10	Replicate 1	50 pgSIT[♀cas9]♂ & 50 WT♂ X 50 WT♀	5070	98.0089	100	86	86	+/+	4970	4165	83.8028	+/+	4138	79.9923	100	88	88	+/+	4038	3511	86.949	+/+	4464	86.2942	100	89	89	+/+	4364	3820	87.5344	+/+	4356	84.2065	100	80	80	+/+	4256	3403	79.9577	+/+	3884	75.0822	100	85	85	+/+	3784
cage11	Replicate 2	50 pgSIT[♀cas9]♂ & 50 WT♂ X 50 WT♀	4832	93.4081	100	92	92	gRNA/+, Cas9/+, +/+	4732	4298	90.8284	gRNA/+, Cas9/+, +/+	4681	90.4891	100	93	93	gRNA/+, +/+	4581	4106	89.6311	gRNA/+, Cas9/+, +/+	4369	84.4578	100	83	83	+/+	4269	3406	79.7845	+/+	4128	79.799	100	84	84	+/+	4028	3492	86.6931	+/+	4059	78.4651	100	86	86	+/+	3959
cage12	Replicate 3	50 pgSIT[♀cas9]♂ & 50 WT♂ X 50 WT♀	4479	86.5842	100	91	91	+/+	4379	4050	92.4869	+/+	4729	91.417	100	77	77	+/+	4629	3755	81.119	+/+	4028	77.8658	100	82	82	+/+	3928	3175	80.8299	+/+	4474	86.4875	100	71	71	+/+	4374	3176	72.6109	+/+	3730	72.1052	100	65	65	+/+	3630
cage13	Replicate 1	250 pgSIT[♀cas9]♂ & 50 WT♂ X 50 WT♀	4776	92.3255	100	94	94	+/+	4676	4305	92.0659	+/+	4276	82.66	100	75	75	+/+	4176	3159	75.6466	+/+	3734	72.1825	100	82	82	+/+	3634	3003	82.6362	+/+	4240	81.964	100	68	68	+/+	4140	2661	64.2754	+/+	3615	69.8821	100	76	76	+/+	3515
cage14	Replicate 2	250 pgSIT[♀cas9]♂ & 50 WT♂ X 50 WT♀	5013	96.907	100	90	90	+/+	4913	4592	93.4663	+/+	4820	93.1761	100	87	87	+/+	4720	4046	85.7203	+/+	4671	90.2958	100	82	82	+/+	4571	3674	80.3763	+/+	3793	73.323	100	84	84	+/+	3693	3170	85.8381	+/+	4078	78.8324	100	87	87	+/+	3978
cage15	Replicate 3	250 pgSIT[♀cas9]♂ & 50 WT♂ X 50 WT♀	4972	96.1144	100	89	89	+/+	4872	4421	90.743	+/+	4936	95.4185	100	85	85	+/+	4836	4233	87.531	+/+	4215	81.4808	100	84	84	+/+	4115	3495	84.9332	+/+	4199	81.1715	100	75	75	+/+	4099	3052	74.4572	+/+	3744	72.3758	100	71	71	+/+	3644
cage16	Replicate 1	500 pgSIT[♀cas9]♂ & 50 WT♂ X 50 WT♀	4574	88.4206	100	87	87	+/+	4474	3810	85.1587	+/+	3904	75.4688	100	78	78	+/+	3804	3050	80.1788	+/+	4059	78.4651	100	81	81	+/+	3959	3277	82.7734	+/+	3590	69.3988	100	52	52	+/+	3490	1733	49.6562	+/+	2480	47.9412	100	44	44	+/+	2380
cage17	Replicate 2	500 pgSIT[♀cas9]♂ & 50 WT♂ X 50 WT♀	4257	82.2927	100	82	82	+/+	4157	3352	80.6351	+/+	3799	73.439	100	75	75	+/+	3699	2936	79.3728	+/+	3520	68.0456	100	62	62	+/+	3420	2004	58.5965	+/+	3015	58.2834	100	35	35	+/+	2915	1127	38.6621	+/+	1692	32.7083	100	26	26	+/+	1592
cage18	Replicate 3	500 pgSIT[♀cas9]♂ & 50 WT♂ X 50 WT♀	4478	86.5649	100	85	85	+/+	4378	3793	86.6377	+/+	4005	77.4212	100	82	82	+/+	3905	3112	79.6927	+/+	3618	69.9401	100	53	53	+/+	3518	1973	56.083	+/+	2744	53.0447	100	46	46	+/+	2644	1295	48.9788	+/+	2428	46.936	100	19	19	+/+	2328
cage19	Replicate 1	1000 pgSIT[♀cas9]♂ & 50 WT♂ X 50 WT♀	4523	87.4348	100	75	75	+/+	4423	3175	71.7839	+/+	3314	64.0634	100	33	33	+/+	3214	1127	35.0653	+/+	2015	38.9523	100	24	24	+/+	1915	527	27.5196	+/+	1019	19.6984	100	7	7	+/+	919	4	0.435256	+/+	273	5.2774	100	0	0	-	173
cage20	Replicate 2	1000 pgSIT[♀cas9]♂ & 50 WT♂ X 50 WT♀	3926	75.8941	100	80	80	+/+	3826	3119	81.5212	+/+	3512	67.891	100	64	64	+/+	3412	2126	62.3095	+/+	2824	54.5911	100	17	17	+/+	2724	438	16.0793	+/+	614	11.8693	100	2	2	+/+	514	19	3.6965	+/+	0	0	0	0	0	-	0
cage21	Replicate 3	1000 pgSIT[♀cas9]♂ & 50 WT♂ X 50 WT♀	4155	80.3209	100	57	57	gRNA/+, Cas9/+, +/+	4055	2477	61.0851	gRNA/+, Cas9/+, +/+	3016	58.3027	100	51	51	+/+	2916	1420	48.6968	+/+	2325	44.9449	100	28	28	+/+	2225	575	25.8427	+/+	982	18.9832	100	0	0	+/+	882	0	0	+/+	0	0	-	-	0	-	-
cage22	Replicate 1	2000 pgSIT[♀cas9]♂ & 50 WT♂ X 50 WT♀	4396	84.9797	100	53	53	+/+	4296	2362	54.9814	+/+	2461	47.5739	100	15	15	+/+	2361	453	19.1868	+/+	771	14.9043	100	0	0	+/+	671	0	0	+/+	0	0	0	0	0	-	0	0	0	-	0	0	-	-	0	-	-
cage23	Replicate 2	2000 pgSIT[♀cas9]♂ & 50 WT♂ X 50 WT♀	4530	87.5701	100	41	41	+/+	4430	1883	42.5056	+/+	1968	38.0437	100	21	21	+/+	1868	466	24.9465	+/+	954	18.4419	100	3	3	+/+	854	37	4.33255	+/+	0	0	0	0	0	-	0	0	0	-	0	0	-	-	0	-	-
cage24	Replicate 3	2000 pgSIT[♀cas9]♂ & 50 WT♂ X 50 WT♀	4879	94.3166	100	46	46	+/+	4779	2050	42.896	+/+	2296	44.3843	100	9	9	+/+	2196	245	11.1566	+/+	537	10.3808	100	0	0	+/+	437	0	0	+/+	0	0	0	0	0	-	0	0	0	-	0	0	-	-	0	-	-
cage1	Replicate 1	50 pgSIT[♂Cas9]♂ & 50 WT♂ X 50 WT♀	4791	92.6155	100	93	93	+/+	4691	4322	92.1339	+/+	4852	93.7947	100	90	90	gRNA/+; Cas9/+；+/+	4752	4370	91.9613	gRNA/+; Cas9/+; gRNA/Cas9/+; +/+	4835	93.4661	100	81	81	gRNA/+; Cas9/+；+/+	4735	3839	81.0771	gRNA/+; Cas9/+; gRNA/Cas9; +/+	4711	91.069	100	85	85	gRNA/+; Cas9/+；+/+	4611	4041	87.6383	gRNA/+; cas9/+; +/+	4279	82.718	100	87	87	gRNA/+; Cas9/+；+/+	4179
cage2	Replicate 2	50 pgSIT[♂Cas9]♂ & 50 WT♂ X 50 WT♀	4627	89.4452	100	84	84	+/+	4527	3886	85.8405	+/+	4721	91.2623	100	87	87	+/+	4621	4083	88.3575	+/+	4773	92.2675	100	84	84	+/+	4673	4030	86.2401	+/+	4515	87.2801	100	80	80	+/+	4415	3508	79.4564	+/+	4476	86.5262	100	85	85	+/+	4376
cage3	Replicate 3	50 pgSIT[♂Cas9]♂ & 50 WT♂ X 50 WT♀	4894	94.6066	100	87	87	+/+	4794	4235	88.3396	+/+	4927	95.2445	100	85	85	+/+	4827	4319	89.4759	+/+	4662	90.1218	100	87	87	+/+	4562	4006	87.8124	+/+	4579	88.5173	100	84	84	+/+	4479	3898	87.0284	+/+	4525	87.4734	100	83	83	+/+	4425
cage4	Replicate 1	250 pgSIT[♂Cas9]♂ & 50 WT♂ X 50 WT♀	5173	100	100	86	86	+/+	5073	4317	85.0976	+/+	4549	87.9374	100	82	82	+/+	4449	3610	81.1418	+/+	4015	77.6145	100	77	77	+/+	3915	3101	79.2082	+/+	4057	78.4264	100	76	76	+/+	3957	3016	76.2194	+/+	3414	65.9965	100	70	70	+/+	3314
cage5	Replicate 2	250 pgSIT[♂Cas9]♂ & 50 WT♂ X 50 WT♀	4527	87.5121	100	91	91	+/+	4427	3899	88.0732	+/+	4633	89.5612	100	88	88	+/+	4533	4003	88.308	+/+	4535	87.6667	100	84	84	+/+	4435	3692	83.2469	+/+	4325	83.6072	100	86	86	+/+	4225	3559	84.2367	+/+	4118	79.6056	100	79	79	+/+	4018
cage6	Replicate 3	250 pgSIT[♂Cas9]♂ & 50 WT♂ X 50 WT♀	5026	97.1583	100	88	88	+/+	4926	4437	90.0731	+/+	4936	95.4185	100	86	86	+/+	4836	4195	86.7452	+/+	4527	87.5121	100	83	83	+/+	4427	3584	80.9578	+/+	4230	81.7707	100	80	80	+/+	4130	3342	80.9201	+/+	3897	75.3335	100	86	86	+/+	3797
cage7	Replicate 1	500 pgSIT[♂Cas9]♂ & 50 WT♂ X 50 WT♀	4775	92.3062	100	83	83	+/+	4675	3931	84.0856	+/+	4524	87.4541	100	75	75	+/+	4424	3267	73.8472	+/+	3520	68.0456	100	53	53	+/+	3420	1774	51.8713	+/+	2718	52.542	100	37	37	+/+	2618	1054	40.2597	+/+	2125	41.0787	100	20	20	+/+	2025
cage8	Replicate 2	500 pgSIT[♂Cas9]♂ & 50 WT♂ X 50 WT♀	5019	97.023	100	83	83	+/+	4919	3992	81.1547	+/+	4155	80.3209	100	70	70	+/+	4055	2918	71.9605	+/+	3431	66.3251	100	71	71	+/+	3331	2343	70.3392	+/+	2634	50.9182	100	42	42	+/+	2534	1117	44.0805	+/+	2001	38.6816	100	23	23	+/+	1901
cage9	Replicate 3	500 pgSIT[♂Cas9]♂ & 50 WT♂ X 50 WT♀	4828	93.3308	100	76	76	+/+	4728	3659	77.39	+/+	3938	76.126	100	64	64	+/+	3838	2529	65.8937	+/+	3769	72.8591	100	47	47	+/+	3669	1720	46.8793	+/+	2513	48.5792	100	31	31	+/+	2413	769	31.869	+/+	1490	28.8034	100	25	25	+/+	1390
cage10	Replicate 1	1000 pgSIT[♂Cas9]♂ & 50 WT♂ X 50 WT♀	4496	86.9128	100	77	77	+/+	4396	3340	75.9782	+/+	3785	73.1684	100	51	51	+/+	3685	2054	55.7395	+/+	2418	46.7427	100	45	45	+/+	2318	1060	45.7291	+/+	1322	25.5558	100	3	3	+/+	1222	58	4.74632	+/+	83	1.60448	83	0	0	+/+	0
cage11	Replicate 2	1000 pgSIT[♂Cas9]♂ & 50 WT♂ X 50 WT♀	4162	80.4562	100	62	62	+/+	4062	2594	63.8602	+/+	3108	60.0812	100	39	39	+/+	3008	1116	37.1011	+/+	2022	39.0876	100	29	29	+/+	1922	512	26.6389	+/+	1473	28.4748	100	9	9	+/+	1373	136	9.90532	+/+	214	4.13686	0	0	0	+/+	214
cage12	Replicate 3	1000 pgSIT[♂Cas9]♂ & 50 WT♂ X 50 WT♀	4237	81.9061	100	75	75	+/+	4137	3137	75.8279	+/+	3210	62.053	100	77	77	+/+	3110	2427	78.0386	+/+	1974	38.1597	100	16	16	+/+	1874	315	16.809	+/+	1026	19.8338	100	0	0	+/+	926	0	0	+/+	0	0	-	-	0	-	-
cage13	Replicate 1	2000 pgSIT[♂Cas9]♂ & 50 WT♂ X 50 WT♀	4179	80.7848	100	47	47	+/+	4079	1981	48.5658	+/+	2273	43.9397	100	18	18	+/+	2173	381	17.5334	+/+	818	15.8129	100	0	0	+/+	718	0	0	+/+	0	0	0	0	0	-	0	0	0	-	0	0	-	-	0	-	-
cage14	Replicate 2	2000 pgSIT[♂Cas9]♂ & 50 WT♂ X 50 WT♀	4218	81.5388	100	39	39	+/+	4118	1689	41.0151	+/+	2014	38.9329	100	15	15	+/+	1914	259	13.5319	+/+	629	12.1593	100	0	0	+/+	529	5	0.94518	+/+	0	0	0	0	0	-	0	0	0	-	0	0	-	-	0	-	-
cage15	Replicate 3	2000 pgSIT[♂Cas9]♂ & 50 WT♂ X 50 WT♀	3970	76.7446	100	59	59	+/+	3870	2234	57.7261	+/+	2875	55.577	100	31	31	+/+	2775	893	32.1802	+/+	1677	32.4183	100	11	11	+/+	1577	195	12.3653	+/+	924	17.862	100	0	0	+/+	824	0	0	+/+	104	2.01044	100	-	0	-	-
[truncated: 3 more columns]

## Sheet: Supp Table 10
Supplementary Table 10. Life history parameters used in mathematical modeling.
Parameter	Value	Reference
Duration of egg stage (days)	2	https://pubmed.ncbi.nlm.nih.gov/24897844/
Duration of larval stage (days)	5	https://pubmed.ncbi.nlm.nih.gov/24897844/
Duration of pupa stage (days)	1	https://pubmed.ncbi.nlm.nih.gov/24897844/
Female fertility (1/day)	20	https://pubmed.ncbi.nlm.nih.gov/16832731/
Daily population growth rate (1/day)	1.175	https://www.sciencedirect.com/science/article/abs/pii/S0304380015003130
Daily mortality of adult stage (1/day)	0.09	https://pubmed.ncbi.nlm.nih.gov/8271242/ https://www.ncbi.nlm.nih.gov/pmc/articles/PMC2641272/ https://www.biodiversitylibrary.org/part/129100

[truncated: 3 more sheets: Supp Table 11, Supp Table 12, Supp Table 13]
